# Supplementary material for: A feasibility study to determine the use of baited pots in Greenland halibut (Reinhardtius hippoglossoides) fisheries, supported by the use of underwater video observations
Source: PeerJ. 2021 Jan 4;9:e10536. doi: 10.7717/peerj.10536 (PMC7789868; doi:10.7717/peerj.10536)
Supplement: Supplemental Information 2 [file peerj-09-10536-s002.xlsx]

## Sheet: Potting bycatch
Pot Number	Day	Month	STRING	Pot	Halibut (kg)	Soak time (hrs)	Three-bearded rockling (kg)	Silver Rockling (kg)	Polar eelpout (kg)	Northern Wolffish (kg)	Spotted Wolffish (kg)	Spinytail Skate (kg)	Roughhead Grenedier (kg)	Polar sculpin (kg)	Total_Bycatch	Total_catch_Wt	Percent_Bycatch
13	20	Oct	1	W 19mm	6.6	34	0.606	0	0	0	0	0	0	0	0.606	7.206	0.0840966
15	20	Oct	1	W 19mm	26.8	34	0	1.016	0	0	0	0	0	0	1.016	27.816	0.0365257
16	20	Oct	1	W 19mm	18.2	34	0.606	0	0	0	0	0	0	0	0.606	18.806	0.0322238
18	20	Oct	1	W 19mm	27.5	34	1.212	0	0	0	0	0	0	0	1.212	28.712	0.0422123
24	20	Oct	2	W 19mm	3.4	24	0	0	0	0	0	0	0	0	0	3.4	0
25	20	Oct	2	W 19mm	2	24	3.03	0.508	0	0	0	0	0	0	3.538	5.538	0.638859
29	20	Oct	2	W 19mm	2.9	24	1.212	0	0	0	0	0	0	0	1.212	4.112	0.294747
31	20	Oct	2	W 19mm	21	24	0.606	0	0	0	0	0	0	0	0.606	21.606	0.0280478
33	20	Oct	2	W 19mm	15.5	24	0	1.016	0	0	0	1.6	0	0	2.616	18.116	0.144403
67	21	Oct	1	W 19mm	10.4	20	0	0	0	0	0	0	0	0	0	10.4	0
69	21	Oct	1	W 19mm	13.1	20	0.606	0	0	0	0	0	0	0	0.606	13.706	0.0442142
70	21	Oct	1	W 19mm	12.9	20	0	0	0	0	0	0	0	0	0	12.9	0
72	21	Oct	1	W 19mm	8.5	20	0	0.508	0	0	0	0	0	0	0.508	9.008	0.0563943
78	21	Oct	1	W 19mm	38.2	20	0.606	0.508	0	0	0	0	0	0	1.114	39.314	0.028336
97	23	Oct	1	W 19mm	11.1	66	0	0	0	0	0	1.6	0	0	1.6	12.7	0.125984
99	23	Oct	1	W 19mm	14.5	66	1.212	0	0	0	0	0	0	0	1.212	15.712	0.0771385
101	23	Oct	1	W 19mm	17.6	66	1.818	1.016	0	0	0	3.2	0	0	6.034	23.634	0.25531
105	23	Oct	1	W 19mm	24.2	66	1.212	0	0	0	0	0	0	0	1.212	25.412	0.047694
106	23	Oct	1	W 19mm	20.7	66	0.606	0	0	0	0	0	0	0	0.606	21.306	0.0284427
123	23	Oct	2	W 19mm	27.4	52.5	0	0.508	0.217	0	0	0	0	0	0.725	28.125	0.0257778
125	23	Oct	2	W 19mm	26.5	52.5	0	0	0	6.9	0	0	0	0	6.9	33.4	0.206587
126	23	Oct	2	W 19mm	19.7	52.5	0	0	0	0	0	0	0	0	0	19.7	0
128	23	Oct	2	W 19mm	13	52.5	0	0	0	37.3	0	0	0	0	37.3	50.3	0.741551
132	23	Oct	2	W 19mm	9.2	52.5	0	0	0	15.1	0	0	0	0	15.1	24.3	0.621399
133	26	Oct	1	W 19mm	8.2	66	0	0	0	0	0	0	0	0	0	8.2	0
137	26	Oct	1	W 19mm	12.7	66	0	0.508	0	0	0	0	0	0	0.508	13.208	0.0384615
139	26	Oct	1	W 19mm	15.6	66	0.606	0	0	0	0	0	0	0	0.606	16.206	0.0373936
162	26	Oct	2	W 19mm	15.5	66	0	0	0.217	0	0	0	0	0	0.217	15.717	0.0138067
164	26	Oct	2	W 19mm	24.6	66	0	0	0.434	0	0	0	0	0	0.434	25.034	0.0173364
166	26	Oct	2	W 19mm	17.4	66	0	0	0	0	0	0	0	0	0	17.4	0
198	27	Oct	1	W 19mm	11.3	21	0	0	0	0	0	0	0	0	0	11.3	0
200	27	Oct	1	W 19mm	14.6	21	0	0	0	0	0	0	0	0	0	14.6	0
202	27	Oct	1	W 19mm	13.2	21	1.212	0	0	0	0	0	0	0	1.212	14.412	0.0840966
206	27	Oct	1	W 19mm	11.5	21	0	0	0	0	0	0	0	0	0	11.5	0
207	27	Oct	1	W 19mm	11.5	21	0	0	0	0	0	0	0.59	0	0.59	12.09	0.0488007
226	28	Oct	1	W 19mm	17.3	16.5	0	0.508	0	0	0	0	0	0	0.508	17.808	0.0285265
228	28	Oct	1	W 19mm	13.1	16.5	0	0	0	0	0	0	0	0	0	13.1	0
230	28	Oct	1	W 19mm	11.7	16.5	1.212	0.508	0	0	0	0	0	0	1.72	13.42	0.128167
234	28	Oct	1	W 19mm	11.2	16.5	0	0	0	6.5	0	0	0	0	6.5	17.7	0.367232
235	28	Oct	1	W 19mm	7.1	16.5	0	0	0	0	0	0	0	0	0	7.1	0
253	28	Oct	2	W 19mm	25.5	42.25	0	0	0	0	4.1	0	0	0	4.1	29.6	0.138514
255	28	Oct	2	W 19mm	22.3	42.25	0	0	0	3.9	0	0	0	0	3.9	26.2	0.148855
257	28	Oct	2	W 19mm	20.9	42.25	0	0	0	8.6	0	0	0	0	8.6	29.5	0.291525
280	29	Oct	1	W 19mm	10.3	16	0	0	0	0	0	0	0	0	0	10.3	0
282	29	Oct	1	W 19mm	14.7	16	0.606	0.508	0	0	0	0	0	0	1.114	15.814	0.0704439
284	29	Oct	1	W 19mm	26.2	16	0.606	0	0	10.9	0	0	0	0	11.506	37.706	0.30515
288	29	Oct	1	W 19mm	17	16	0	0	0	0	0	0	0	0	0	17	0
303	29	Oct	2	W 19mm	16.4	16	0	0	0.217	0	0	0	0.59	0	0.807	17.207	0.0468995
305	29	Oct	2	W 19mm	15.2	16	0.606	0.508	0.217	0	0	0	0	0	1.331	16.531	0.0805154
306	29	Oct	2	W 19mm	10.7	16	0	0.508	0.217	0	0	0	0	0	0.725	11.425	0.0634573
308	29	Oct	2	W 19mm	17	16	0	0.508	0.217	0	0	0	0	0	0.725	17.725	0.0409027
11	20	Oct	1	W 50mm	9.8	34	1.818	1.016	0	0	0	0	0	0	2.834	12.634	0.224315
12	20	Oct	1	W 50mm	2.2	34	0.606	0.508	0	0	0	0	0	0	1.114	3.314	0.33615
14	20	Oct	1	W 50mm	12.7	34	0.606	2.032	0	0	0	0	0	0	2.638	15.338	0.171991
17	20	Oct	1	W 50mm	10.3	34	0	0	0	9	0	0	0	0	9	19.3	0.466321
21	20	Oct	1	W 50mm	15.4	34	2.424	0.508	0	0	0	0	0	0	2.932	18.332	0.159939
27	20	Oct	2	W 50mm	7.9	24	0	0	0	0	0	0	0	0	0	7.9	0
28	20	Oct	2	W 50mm	19.2	24	0	0.508	0	0	0	1.6	0	0	2.108	21.308	0.09893
30	20	Oct	2	W 50mm	18.2	24	1.818	0.508	0	0	0	0	0	0	2.326	20.526	0.11332
36	20	Oct	2	W 50mm	10.4	24	0	0	0	0	0	0	0	0	0	10.4	0
37	20	Oct	2	W 50mm	2.6	24	0.606	0	0	0	0	0	0	0	0.606	3.206	0.189021
65	21	Oct	1	W 50mm	4.6	20	0	0	0	0	0	0	0	0	0	4.6	0
66	21	Oct	1	W 50mm	3.4	20	0	1.016	0	0	0	0	0	0	1.016	4.416	0.230072
68	21	Oct	1	W 50mm	2.7	20	0	0	0	0	0	0	0	0	0	2.7	0
71	21	Oct	1	W 50mm	7.1	20	0	0.508	0	0	0	0	0	0	0.508	7.608	0.0667718
75	21	Oct	1	W 50mm	14.9	20	0	0	0	0	0	0	0	0	0	14.9	0
93	23	Oct	1	W 50mm	16.9	66	0	0	0	0	0	0	0	0	0	16.9	0
94	23	Oct	1	W 50mm	24.4	66	0	0	0	0	0	0	0	0	0	24.4	0
100	23	Oct	1	W 50mm	19.2	66	0	0	0	0	0	1.6	0	0.1	1.7	20.9	0.0813397
102	23	Oct	1	W 50mm	16.9	66	0	0	0	0	0	0	0	0	0	16.9	0
103	23	Oct	1	W 50mm	24.2	66	2.424	1.016	0	0	0	0	0	0	3.44	27.64	0.124457
121	23	Oct	2	W 50mm	12.7	52.5	0	0	0	0	0	0	0	0	0	12.7	0
122	23	Oct	2	W 50mm	12.7	52.5	0.606	0	0.217	0	3.3	0	0	0	4.123	16.823	0.245081
124	23	Oct	2	W 50mm	28.8	52.5	0.606	0.508	0	0	0	0	0	0	1.114	29.914	0.0372401
127	23	Oct	2	W 50mm	38.4	52.5	0.606	0	0	0	0	0	0	0	0.606	39.006	0.0155361
130	23	Oct	2	W 50mm	31.5	52.5	0.606	0	0.217	0	0	0	0	0	0.823	32.323	0.0254617
135	26	Oct	1	W 50mm	8.8	66	1.212	0.508	0	0	0	0	0	0	1.72	10.52	0.163498
136	26	Oct	1	W 50mm	3.2	66	0	0	0	0	0	1.6	0	0	1.6	4.8	0.333333
138	26	Oct	1	W 50mm	20.1	66	0	0	0	5.1	0	0	0	0	5.1	25.2	0.202381
143	26	Oct	1	W 50mm	19.6	66	0	0	0	0	0	0	0	0	0	19.6	0
159	26	Oct	2	W 50mm	31.9	66	0	0	0.434	0	0	0	0	0	0.434	32.334	0.0134224
163	26	Oct	2	W 50mm	13.2	66	0	0	0	0	0	0	0.59	0	0.59	13.79	0.0427846
165	26	Oct	2	W 50mm	11.8	66	0.606	0	0	0	0	0	0	0	0.606	12.406	0.0488473
167	26	Oct	2	W 50mm	11.8	66	0	0.508	0	0	0	0	0	0	0.508	12.308	0.041274
194	27	Oct	1	W 50mm	11.3	21	0.606	0	0	0	0	0	0	0	0.606	11.906	0.0508987
195	27	Oct	1	W 50mm	7.9	21	0	0	0	0	0	0	0	0	0	7.9	0
201	27	Oct	1	W 50mm	11	21	0	1.016	0	0	0	0	0	0	1.016	12.016	0.0845539
203	27	Oct	1	W 50mm	11.7	21	0.606	1.016	0	0	0	0	0	0	1.622	13.322	0.121753
204	27	Oct	1	W 50mm	15.4	21	0	0	0	0	0	0	0	0	0	15.4	0
222	28	Oct	1	W 50mm	3.9	16.5	0	0	0	0	0	0	0	0	0	3.9	0
223	28	Oct	1	W 50mm	10	16.5	0	0	0	0	0	0	0	0	0	10	0
229	28	Oct	1	W 50mm	7.2	16.5	0.606	0	0	4	0	0	0	0	4.606	11.806	0.390141
231	28	Oct	1	W 50mm	4.8	16.5	0	0	0	0	0	0	0	0	0	4.8	0
232	28	Oct	1	W 50mm	15.2	16.5	0	0	0	0	0	0	0	0	0	15.2	0
251	28	Oct	2	W 50mm	16.1	42.25	0	0	0	0	0	0	0	0	0	16.1	0
252	28	Oct	2	W 50mm	16.2	42.25	0	0	0.217	0	0	0	0	0	0.217	16.417	0.013218
254	28	Oct	2	W 50mm	25	42.25	0	0	0	0	0	0	0	0	0	25	0
256	28	Oct	2	W 50mm	19.4	42.25	0	0	0	0	0	0	0	0	0	19.4	0
260	28	Oct	2	W 50mm	24.9	42.25	0.606	0	0.217	0	0	0	0	0	0.823	25.723	0.0319947
276	29	Oct	1	W 50mm	12.7	16	0	0	0	0	0	0	0	0	0	12.7	0
277	29	Oct	1	W 50mm	2.1	16	0.606	0.508	0	0	0	0	0	0	1.114	3.214	0.346609
283	29	Oct	1	W 50mm	10.4	16	0	0	0	4.9	0	0	0	0	4.9	15.3	0.320261
285	29	Oct	1	W 50mm	17.9	16	0	0	0	0	0	0	0	0	0	17.9	0
286	29	Oct	1	W 50mm	33	16	0	0	0	7.3	0	0	0	0	7.3	40.3	0.181141
302	29	Oct	2	W 50mm	1.9	16	0	0	0	0	0	0	0	0	0	1.9	0
304	29	Oct	2	W 50mm	8.9	16	0	0	0.217	0	0	0	0.59	0	0.807	9.707	0.0831359
307	29	Oct	2	W 50mm	5.1	16	1.212	0	0	0	2.6	0	0	0	3.812	8.912	0.427738
310	29	Oct	2	W 50mm	6	16	0	0.508	0	0	0	0	0.59	0	1.098	7.098	0.154691
10	20	Oct	1	W 3mm	5.6	34	0	0	0	0	0	0	0	0	0	5.6	0
19	20	Oct	1	W 3mm	17.4	34	3.03	0	0	0	0	0	0	0	3.03	20.43	0.148311
20	20	Oct	1	W 3mm	14.5	34	1.818	0	0	0	0	0	0	0	1.818	16.318	0.111411
22	20	Oct	1	W 3mm	8.5	34	0	0	0	0	0	1.6	0	0	1.6	10.1	0.158416
23	20	Oct	1	W 3mm	8.8	34	0.606	0	0	0	7.1	0	0	0	7.706	16.506	0.466861
26	20	Oct	2	W 3mm	8	24	1.212	2.54	0	0	0	3.2	0	0	6.952	14.952	0.464955
32	20	Oct	2	W 3mm	5.9	24	1.212	0	0	0	0	0	0	0	1.212	7.112	0.170416
34	20	Oct	2	W 3mm	5.5	24	0	0	0	0	0	0	0	0.1	0.1	5.6	0.0178571
35	20	Oct	2	W 3mm	8	24	0	0	0	0	0	0	0	0	0	8	0
64	21	Oct	1	W 3mm	5.2	20	0	0.508	0	0	0	0	0	0	0.508	5.708	0.0889979
73	21	Oct	1	W 3mm	12.5	20	0	0	0	0	0	0	0	0	0	12.5	0
74	21	Oct	1	W 3mm	17.6	20	0	0.508	0	0	0	0	0	0	0.508	18.108	0.0280539
76	21	Oct	1	W 3mm	21	20	1.212	0	0	0	0	0	0	0	1.212	22.212	0.0545651
77	21	Oct	1	W 3mm	22.4	20	0.606	0	0	0	0	0	0	0	0.606	23.006	0.026341
95	23	Oct	1	W 3mm	17.8	66	0	0	0	0	0	1.6	0	0	1.6	19.4	0.0824742
96	23	Oct	1	W 3mm	27.3	66	1.212	0	0	0	0	0	0	0	1.212	28.512	0.0425084
98	23	Oct	1	W 3mm	31.4	66	1.212	0	0	0	0	0	0	0	1.212	32.612	0.0371642
104	23	Oct	1	W 3mm	15.3	66	0.606	0	0	0	0	0	0	0	0.606	15.906	0.0380988
120	23	Oct	2	W 3mm	2.7	52.5	0	0	0	0	2.3	0	0	0	2.3	5	0.46
129	23	Oct	2	W 3mm	24.4	52.5	0	0	0	0	0	0	0	0	0	24.4	0
131	23	Oct	2	W 3mm	17.6	52.5	0	0	0	0	5.9	0	0	0	5.9	23.5	0.251064
134	26	Oct	1	W 3mm	10.1	66	0	0	0	0	0	0	0	0	0	10.1	0
140	26	Oct	1	W 3mm	7.5	66	0	0	0	0	0	0	0	0	0	7.5	0
141	26	Oct	1	W 3mm	0	66	0	0	0	0	0	0	0	0	0	0	0
142	26	Oct	1	W 3mm	6.6	66	1.818	0	0	0	0	0	0	0	1.818	8.418	0.215966
157	26	Oct	2	W 3mm	7.5	66	0	0	0	6.3	0	0	0	0	6.3	13.8	0.456522
158	26	Oct	2	W 3mm	10.4	66	0	0	0.217	0	0	0	0	0	0.217	10.617	0.0204389
160	26	Oct	2	W 3mm	7.6	66	0.606	0	0.217	0	0	0	0	0	0.823	8.423	0.0977087
161	26	Oct	2	W 3mm	11.2	66	0	0	0	0	0	0	0	0	0	11.2	0
196	27	Oct	1	W 3mm	7.1	21	0.606	1.016	0	0	0	0	0	0	1.622	8.722	0.185967
197	27	Oct	1	W 3mm	15.2	21	0	0	0	0	0	0	0	0	0	15.2	0
199	27	Oct	1	W 3mm	1.5	21	0	0	0	0	0	0	0	0	0	1.5	0
205	27	Oct	1	W 3mm	8.2	21	0	0	0	0	0	0	0	0	0	8.2	0
224	28	Oct	1	W 3mm	12.3	16.5	0	0.508	0	0	0	0	0	0	0.508	12.808	0.0396627
225	28	Oct	1	W 3mm	12	16.5	0	0	0	0	0	0	0	0	0	12	0
227	28	Oct	1	W 3mm	6.2	16.5	0	0	0	0	0	0	0	0	0	6.2	0
233	28	Oct	1	W 3mm	8.5	16.5	0.606	0	0	0	0	0	0	0	0.606	9.106	0.0665495
250	28	Oct	2	W 3mm	14.1	42.25	0	0	0	0	0	0	0	0	0	14.1	0
258	28	Oct	2	W 3mm	13	42.25	0	0	0	5.2	0	0	0	0	5.2	18.2	0.285714
259	28	Oct	2	W 3mm	18.8	42.25	0.606	0	0	0	0	0	0	0	0.606	19.406	0.0312275
261	28	Oct	2	W 3mm	33	42.25	0	0	0	0	0	0	0	0	0	33	0
262	28	Oct	2	W 3mm	19	42.25	0	0	0	14.6	0	0	0	0	14.6	33.6	0.434524
278	29	Oct	1	W 3mm	0	16	0	0	0	9.6	0	0	0	0	9.6	9.6	1
279	29	Oct	1	W 3mm	9.8	16	0	0	0	0.1	0	0	0	0	0.1	9.9	0.010101
281	29	Oct	1	W 3mm	13.5	16	0	0	0	0	0	0	0	0	0	13.5	0
287	29	Oct	1	W 3mm	15.4	16	0	0.508	0	0	0	0	0	0	0.508	15.908	0.0319336
301	29	Oct	2	W 3mm	5.9	16	0	0	0	0	0	0	0	0	0	5.9	0
309	29	Oct	2	W 3mm	2.7	16	0	0	0	0	0	0	0	0	0	2.7	0
311	29	Oct	2	W 3mm	11.2	16	0	0.508	0	18.8	0	0	0	0	19.308	30.508	0.632883
312	29	Oct	2	W 3mm	5.5	16	0	0	0	0	0	0	0	0	0	5.5	0
2	20	Oct	1	N 19mm	17.3	34	1.212	1.524	0	0	0	0	0	0	2.736	20.036	0.136554
5	20	Oct	1	N 19mm	16.8	34	2.424	0	0	0	0	0	0	0	2.424	19.224	0.126092
7	20	Oct	1	N 19mm	17.5	34	0	1.016	0	0	0	1.6	0	0	2.616	20.116	0.130046
38	20	Oct	2	N 19mm	23	24	0	0	0	0	0	0	0	0	0	23	0
42	20	Oct	2	N 19mm	12.2	24	0.606	0.508	0	0	0	0	0	0	1.114	13.314	0.0836713
45	20	Oct	2	N 19mm	8.6	24	1.212	0	0	0	0	0	0	0	1.212	9.812	0.123522
48	20	Oct	2	N 19mm	13.2	24	0	0	0	0	0	0	0	0	0	13.2	0
51	20	Oct	2	N 19mm	8	24	1.818	0.508	0	15.9	0	0	0	0	18.226	26.226	0.694959
52	21	Oct	1	N 19mm	3	20	0	0	0	0	0	0	0	0	0	3	0
56	21	Oct	1	N 19mm	11.4	20	0	0	0	0	0	0	0	0	0	11.4	0
59	21	Oct	1	N 19mm	20.8	20	1.212	0	0	0	0	0	0	0	1.212	22.012	0.0550609
61	21	Oct	1	N 19mm	24.7	20	0.606	0	0	0	0	0	0	0	0.606	25.306	0.0239469
79	23	Oct	1	N 19mm	38.1	66	0.606	0	0.217	0	0	0	0	0	0.823	38.923	0.0211443
82	23	Oct	1	N 19mm	7.8	66	2.424	0.508	0	0	0	0	0	0	2.932	10.732	0.273202
85	23	Oct	1	N 19mm	26.4	66	1.818	0	0	0	0	0	0	0	1.818	28.218	0.064427
88	23	Oct	1	N 19mm	19.2	66	2.424	0.508	0	0	0	0	0	0	2.932	22.132	0.132478
92	23	Oct	1	N 19mm	17.3	66	1.818	1.016	0	0	0	1.6	0	0	4.434	21.734	0.204012
107	23	Oct	2	N 19mm	14.5	52.5	0	0	0	8.5	0	0	0	0	8.5	23	0.369565
112	23	Oct	2	N 19mm	36.3	52.5	0	0	0	0	0	0	0	0	0	36.3	0
114	23	Oct	2	N 19mm	21.4	52.5	1.212	0.508	0.217	0	6	0	0	0	7.937	29.337	0.270546
115	23	Oct	2	N 19mm	18.9	52.5	0	1.016	0	0	0	0	0	0	1.016	19.916	0.0510143
116	23	Oct	2	N 19mm	22.1	52.5	0.606	0	0.217	4.2	0	0	0	0	5.023	27.123	0.185193
144	26	Oct	1	N 19mm	22.3	66	0.606	0.508	0	0	0	1.6	0	0	2.714	25.014	0.108499
147	26	Oct	1	N 19mm	11.9	66	0.606	1.016	0	0	0	0	0	0	1.622	13.522	0.119953
150	26	Oct	1	N 19mm	19.6	66	0.606	0.508	0	0.1	0	0	0	0	1.214	20.814	0.0583261
153	26	Oct	1	N 19mm	13.1	66	0.606	0	0	0	0	0	0	0	0.606	13.706	0.0442142
156	26	Oct	1	N 19mm	20.5	66	0.606	1.016	0	0	0	0	0	0	1.622	22.122	0.0733207
170	26	Oct	2	N 19mm	16.8	66	0	0	0.217	0	0	0	0	0	0.217	17.017	0.012752
172	26	Oct	2	N 19mm	8.2	66	0	0	0	0	0	0	0	0	0	8.2	0
175	26	Oct	2	N 19mm	17.1	66	0.606	0.508	0	0	0	0	0	0	1.114	18.214	0.0611617
180	26	Oct	2	N 19mm	27.2	66	0.606	0.508	0.217	0	0	0	0	0	1.331	28.531	0.046651
182	27	Oct	1	N 19mm	19.3	21	0	0.508	0	0	0	0	0	0	0.508	19.808	0.0256462
185	27	Oct	1	N 19mm	20.5	21	0	0	0	0	0	0	0	0	0	20.5	0
188	27	Oct	1	N 19mm	10.2	21	1.818	0	0	0	0	0	0	0	1.818	12.018	0.151273
191	27	Oct	1	N 19mm	15.8	21	0	0	0	0	0	0	0	0	0	15.8	0
193	27	Oct	1	N 19mm	8.7	21	1.212	0	0	0	2.5	0	0	0	3.712	12.412	0.299065
209	28	Oct	1	N 19mm	16.7	16.5	1.818	0	0	0	0	0	0.59	0	2.408	19.108	0.126021
212	28	Oct	1	N 19mm	16.3	16.5	0	0.508	0	0	0	0	0	0	0.508	16.808	0.0302237
214	28	Oct	1	N 19mm	8.3	16.5	0	1.016	0	0	0	0	0	0	1.016	9.316	0.10906
217	28	Oct	1	N 19mm	7.5	16.5	1.818	0	0	0	0	0	0.59	0	2.408	9.908	0.243036
221	28	Oct	1	N 19mm	16.5	16.5	0	0	0	0	0	0	0	0	0	16.5	0
236	28	Oct	2	N 19mm	24.5	42.25	0.606	0	0	0	2.7	0	0	0	3.306	27.806	0.118895
241	28	Oct	2	N 19mm	22.7	42.25	1.212	0	0	0	0	0	0	0	1.212	23.912	0.0506858
244	28	Oct	2	N 19mm	27.2	42.25	0	0	0	0	0	0	0	0	0	27.2	0
246	28	Oct	2	N 19mm	21.5	42.25	0	0.508	0.217	0	0	0	0.59	0	1.315	22.815	0.0576375
264	29	Oct	1	N 19mm	17.5	16	0	0	0	0	0	0	0	0	0	17.5	0
267	29	Oct	1	N 19mm	15	16	0	0	0	0	0	0	0	0	0	15	0
271	29	Oct	1	N 19mm	22.5	16	1.212	0	0	0	0	0	0	0	1.212	23.712	0.0511134
275	29	Oct	1	N 19mm	9.6	16	0	0	0	0	0	0	0	0	0	9.6	0
289	29	Oct	2	N 19mm	13.5	16	0.606	0	0	0	0	0	0	0	0.606	14.106	0.0429604
293	29	Oct	2	N 19mm	15.7	16	0	0.508	0	0	0	0	0	0	0.508	16.208	0.0313425
296	29	Oct	2	N 19mm	13.4	16	0	0.508	0	0	0	0	0	0	0.508	13.908	0.0365257
298	29	Oct	2	N 19mm	19	16	0	0.508	0	0	0	0	0	0	0.508	19.508	0.0260406
3	20	Oct	1	N 50mm	21.5	34	1.212	0	0	0	0	0	0	0	1.212	22.712	0.0533639
6	20	Oct	1	N 50mm	20.5	34	1.212	1.016	0	0	0	1.6	0	0	3.828	24.328	0.15735
41	20	Oct	2	N 50mm	2.5	24	1.212	0	0	0	0	1.6	0	0	2.812	5.312	0.529367
43	20	Oct	2	N 50mm	8.5	24	2.424	0	0	0	0	0	0	0	2.424	10.924	0.221897
46	20	Oct	2	N 50mm	16.1	24	0.606	0.508	0	0	0	1.6	0	0	2.714	18.814	0.144254
50	20	Oct	2	N 50mm	21	24	1.818	0.508	0	0	0	0	0	0.1	2.426	23.426	0.10356
54	21	Oct	1	N 50mm	1.9	20	0	0	0	0	0	0	0	0	0	1.9	0
57	21	Oct	1	N 50mm	11.7	20	0	0.508	0	0	0	0	0	0	0.508	12.208	0.0416121
60	21	Oct	1	N 50mm	12.8	20	0	0	0	2.1	0	0	0	0	2.1	14.9	0.14094
80	23	Oct	1	N 50mm	22.5	66	0	1.016	0	0	0	0	0	0	1.016	23.516	0.0432046
84	23	Oct	1	N 50mm	17.4	66	0	0	0	0	0	0	0	0	0	17.4	0
87	23	Oct	1	N 50mm	14.5	66	0	0	0	0	0	0	0	0	0	14.5	0
89	23	Oct	1	N 50mm	17.4	66	0.606	0	0	0	0	0	0	0	0.606	18.006	0.0336554
109	23	Oct	2	N 50mm	30.3	52.5	0.606	1.524	0	0	0	0	0	0	2.13	32.43	0.0656799
110	23	Oct	2	N 50mm	2.9	52.5	0	0	0	0	0	0	0.59	0	0.59	3.49	0.169054
119	23	Oct	2	N 50mm	16	52.5	0.606	0.508	0	3.2	0	0	0	0	4.314	20.314	0.212366
146	26	Oct	1	N 50mm	11.6	66	0	0	0	0	0	0	0	0	0	11.6	0
148	26	Oct	1	N 50mm	13.6	66	0	0	0	0	0	0	0	0	0	13.6	0
151	26	Oct	1	N 50mm	10.4	66	0	0	0	5.9	0	0	0	0	5.9	16.3	0.361963
155	26	Oct	1	N 50mm	17.3	66	0	0	0	0	0	0	0	0	0	17.3	0
168	26	Oct	2	N 50mm	12.8	66	0	0	0	0	0	0	0	0	0	12.8	0
171	26	Oct	2	N 50mm	5.3	66	0	0	0	0	0	0	0	0	0	5.3	0
174	26	Oct	2	N 50mm	16.9	66	0.606	0	0	0	0	0	0	0	0.606	17.506	0.0346167
177	26	Oct	2	N 50mm	10.4	66	0	0	0	0	0	0	0	0	0	10.4	0
178	26	Oct	2	N 50mm	9	66	0	0	0	5.2	0	0	0	0	5.2	14.2	0.366197
181	27	Oct	1	N 50mm	36.3	21	0	0	0	0	0	0	0	0	0	36.3	0
183	27	Oct	1	N 50mm	16.7	21	0	0	0	0	0	0	0	0	0	16.7	0
187	27	Oct	1	N 50mm	8	21	0	0	0	0	0	0	0	0	0	8	0
190	27	Oct	1	N 50mm	14.5	21	0	0	0	0	0	0	0	0	0	14.5	0
192	27	Oct	1	N 50mm	11.6	21	0	0.508	0	0	0	0	0	0.1	0.608	12.208	0.0498034
208	28	Oct	1	N 50mm	14	16.5	0	0	0	0	0	0	0.59	0.1	0.69	14.69	0.0469707
210	28	Oct	1	N 50mm	5.1	16.5	0	0	0	0	0	0	0	0	0	5.1	0
216	28	Oct	1	N 50mm	6.5	16.5	0	0	0	0	0	0	0	0	0	6.5	0
218	28	Oct	1	N 50mm	3.7	16.5	0.606	0	0	3.2	0	0	0	0	3.806	7.506	0.507061
238	28	Oct	2	N 50mm	36.8	42.25	0.606	0	0	0	5.8	0	0	0	6.406	43.206	0.148266
239	28	Oct	2	N 50mm	9	42.25	0	0	0	0	0	0	0	0	0	9	0
242	28	Oct	2	N 50mm	19.4	42.25	0	0.508	0	12.4	0	0	0	0	12.908	32.308	0.39953
245	28	Oct	2	N 50mm	28	42.25	0.606	0.508	0	2.1	0	0	0	0	3.214	31.214	0.102967
249	28	Oct	2	N 50mm	15.7	42.25	0	0	0	0	0	0	0	0	0	15.7	0
263	29	Oct	1	N 50mm	7.5	16	0	0	0	0	0	0	0	0	0	7.5	0
265	29	Oct	1	N 50mm	4.9	16	0	0	0	0	0	0	0	0	0	4.9	0
270	29	Oct	1	N 50mm	11.3	16	0	0	0	0	0	0	0	0	0	11.3	0
272	29	Oct	1	N 50mm	11.7	16	0	0.508	0	0	0	0	0	0	0.508	12.208	0.0416121
291	29	Oct	2	N 50mm	2.6	16	0.606	0	0	0	0	0	0	0	0.606	3.206	0.189021
294	29	Oct	2	N 50mm	15.7	16	0	0	0.217	0	0	0	0	0	0.217	15.917	0.0136332
297	29	Oct	2	N 50mm	8.7	16	0.606	0	0	0	0	0	0	0	0.606	9.306	0.0651193
300	29	Oct	2	N 50mm	22	16	0	0	0	0	0	0	0	0	0	22	0
1	20	Oct	1	N 3mm	12.6	34	1.212	0.508	0	0	0	1.6	0	0	3.32	15.92	0.208543
4	20	Oct	1	N 3mm	13.7	34	1.818	1.016	0	0	0	0	0	0	2.834	16.534	0.171404
8	20	Oct	1	N 3mm	16	34	2.424	1.016	0	4.3	0	0	0	0	7.74	23.74	0.326032
9	20	Oct	1	N 3mm	22.7	34	1.818	0.508	0	0	0	0	0	0	2.326	25.026	0.0929433
39	20	Oct	2	N 3mm	13.9	24	1.212	0.508	0	0	0	1.6	0	0	3.32	17.22	0.192799
40	20	Oct	2	N 3mm	6	24	1.818	0.508	0	0	0	1.6	0	0	3.926	9.926	0.395527
44	20	Oct	2	N 3mm	6.1	24	1.818	0	0	0	0	0	0	0	1.818	7.918	0.229603
47	20	Oct	2	N 3mm	9	24	1.212	0	0	0	0	0	0	0	1.212	10.212	0.118684
49	20	Oct	2	N 3mm	10	24	0.606	0	0	0	0	0	0	0.1	0.706	10.706	0.0659443
53	21	Oct	1	N 3mm	0	20	0	0	0	0	0	0	0	0	0	0	0
55	21	Oct	1	N 3mm	17	20	1.212	0	0	0	0	0	0	0	1.212	18.212	0.0665495
58	21	Oct	1	N 3mm	14.5	20	0	0	0	14	0	0	0	0	14	28.5	0.491228
62	21	Oct	1	N 3mm	21	20	1.818	0	0	0	0	0	0	0	1.818	22.818	0.0796739
63	21	Oct	1	N 3mm	10	20	1.212	0.508	0	0	0	0	0	0	1.72	11.72	0.146758
81	23	Oct	1	N 3mm	17.9	66	0	0	0	0	0	0	0	0	0	17.9	0
83	23	Oct	1	N 3mm	28.5	66	0	1.016	0	0	0	0	0	0	1.016	29.516	0.034422
86	23	Oct	1	N 3mm	21.1	66	1.818	0.508	0	0	0	0	0	0	2.326	23.426	0.0992914
90	23	Oct	1	N 3mm	11.5	66	0.606	0	0	0	0	0	0	0	0.606	12.106	0.0500578
91	23	Oct	1	N 3mm	16.9	66	1.212	0	0	0	0	0	0	0	1.212	18.112	0.066917
108	23	Oct	2	N 3mm	26.2	52.5	0.606	0	0	15.5	0	0	0	0	16.106	42.306	0.380703
111	23	Oct	2	N 3mm	24.3	52.5	0	0	0	4.7	0	0	0	0	4.7	29	0.162069
113	23	Oct	2	N 3mm	21.2	52.5	1.212	0.508	0.217	0	0	0	0	0	1.937	23.137	0.0837187
117	23	Oct	2	N 3mm	24	52.5	0	1.016	0	0	0	0	0	0	1.016	25.016	0.040614
118	23	Oct	2	N 3mm	23.1	52.5	0	0	0	1.8	0	0	0	0	1.8	24.9	0.0722892
145	26	Oct	1	N 3mm	7.4	66	0	0	0	0	0	0	0	0	0	7.4	0
149	26	Oct	1	N 3mm	14.5	66	0	0	0	0	0	0	0	0	0	14.5	0
152	26	Oct	1	N 3mm	8.4	66	0	0	0	6.4	0	0	0	0	6.4	14.8	0.432432
154	26	Oct	1	N 3mm	6	66	1.212	0	0	0	0	0	0	0	1.212	7.212	0.168053
169	26	Oct	2	N 3mm	0	66	0	0	0	0	0	0	0	0	0	0	0
173	26	Oct	2	N 3mm	12.4	66	0	0	0	11.7	0	0	0	0	11.7	24.1	0.485477
176	26	Oct	2	N 3mm	5.7	66	2.424	0.508	0	0	0	0	0	0	2.932	8.632	0.339666
179	26	Oct	2	N 3mm	20.5	66	0	0	0	0	0	0	0	0	0	20.5	0
184	27	Oct	1	N 3mm	13.4	21	0	0	0	0	0	0	0	0	0	13.4	0
186	27	Oct	1	N 3mm	17.7	21	0	0	0	0	0	0	0	0	0	17.7	0
189	27	Oct	1	N 3mm	6.9	21	0	0	0	0	0	0	0	0	0	6.9	0
211	28	Oct	1	N 3mm	6.7	16.5	0	0.508	0	0	0	0	0	0	0.508	7.208	0.0704772
213	28	Oct	1	N 3mm	3.9	16.5	1.818	0	0	0	0	0	0	0	1.818	5.718	0.317943
215	28	Oct	1	N 3mm	5.6	16.5	0	0.508	0	0	0	0	0	0.1	0.608	6.208	0.0979381
219	28	Oct	1	N 3mm	6.2	16.5	0.606	0	0	0	0	0	0	0	0.606	6.806	0.0890391
220	28	Oct	1	N 3mm	9.2	16.5	0	0	0	0	0	0	0	0	0	9.2	0
237	28	Oct	2	N 3mm	24	42.25	0	0	0	14.8	0	0	0	0	14.8	38.8	0.381443
240	28	Oct	2	N 3mm	21.3	42.25	0	0	0	0	0	0	0	0	0	21.3	0
243	28	Oct	2	N 3mm	31.7	42.25	0	0	0	0	0	0	0	0	0	31.7	0
247	28	Oct	2	N 3mm	26	42.25	0	0	0.217	0	0	0	0	0	0.217	26.217	0.00827707
248	28	Oct	2	N 3mm	29	42.25	0	0	0	0	0	0	0	0	0	29	0
266	29	Oct	1	N 3mm	14.3	16	0.606	0.508	0	0	0	0	0	0	1.114	15.414	0.072272
268	29	Oct	1	N 3mm	16.7	16	0	0	0	0	0	0	0	0	0	16.7	0
269	29	Oct	1	N 3mm	1.6	16	0	0	0	0	0	0	0	0	0	1.6	0
273	29	Oct	1	N 3mm	7.4	16	0.606	0.508	0	0	0	0	0	0	1.114	8.514	0.130843
274	29	Oct	1	N 3mm	8.6	16	0	0	0	0	0	0	0	0	0	8.6	0
290	29	Oct	2	N 3mm	2.1	16	0	0	0	0	0	0	0	0	0	2.1	0
292	29	Oct	2	N 3mm	13.7	16	0	0	0	0	0	0	0	0	0	13.7	0
295	29	Oct	2	N 3mm	8	16	0	0.508	0	0	0	0	0	0	0.508	8.508	0.0597085
299	29	Oct	2	N 3mm	12	16	0.606	0	0	0	0	0	0	0	0.606	12.606	0.0480723

## Sheet: Sheet1
3 bearded rockling
W 3mm	W 50mm	W 19 mm	N 3 mm	N 50 mm	N 19mm
0	0.143897	0.0840966	0.0761307	0.0533639	0.0604911
0.148311	0.182861	0	0.109955	0.0498191	0.126092
0.111411	0.0395097	0.0322238	0.102106	0.228163	0
0	0	0.0422123	0.0726444	0.221897	0
0.0367139	0.132228	0	0.0703833	0.0322101	0.045516
0.0810594	0	0.547129	0.183155	0.0776061	0.123522
0.170416	0	0.294747	0.229603	0	0
0	0.0885706	0.0280478	0.118684	0	0.0693205
0	0	0	0.0566038	0	0
0	0.189021	0	0	0	0
0	0	0.0442142	0.0665495	0	0.0550609
0	0	0	0	0	0.0239469
0.0545651	0	0	0.0796739	0.0336554	0.0155692
0.026341	0	0.0154144	0.103413	0.0186864	0.225867
0	0	0	0	0	0.064427
0.0425084	0	0.0771385	0	0.0298316	0.109525
0.0371642	0	0.0769231	0.0776061	0	0.0836477
0.0380988	0	0.047694	0.0500578	0	0
0	0	0.0284427	0.066917	0	0
0	0.087699	0	0.0143242	0	0.041313
0	0	0	0	0	0
0	0.0360221	0	0.0523836	0	0.0223427
0	0.0202581	0	0	0.0346167	0.0242264
0	0.0155361	0	0	0	0.0448159
0.215966	0.0187483	0	0	0	0.029115
0	0.115209	0	0	0	0.0442142
0	0	0.0373936	0	0	0.0273935
0.0719459	0	0	0.168053	0	0
0	0	0	0	0	0
0.0694795	0	0	0	0	0.0332711
0	0	0	0.280816	0	0.0212401
0	0.0488473	0	0	0	0
0	0	0.0840966	0	0	0
0	0.0508987	0	0	0.0807354	0.151273
0	0	0	0	0.0140258	0
0	0	0	0	0	0.0976474			mean	0.0283198	2.83198
0.0665495	0.0454887	0	0.317943	0	0.0951434			st. dev	0.0532171	5.32171
0	0	0.090313	0	0.0194144	0			dt. Error	0.00704878	0.704878
0	0	0	0.0890391	0	0
0.0312275	0	0	0	0	0.183488
0	0.0513298	0	0	0	0
0	0	0	0	0	0.0217939
0	0	0	0	0	0.0506858
0	0	0	0	0.189021	0
0	0	0.0383205	0	0	0
0	0	0.0160717	0.0393149	0.0651193	0
0	0	0	0	0	0
0	0.0235587	0	0		0.0511134
0	0	0.0366584	0.0711769		0
0	0.18855	0	0		0.0429604
	0	0	0		0
	0		0		0
	0		0		0
	0		0.0480723
	0
	0.135996
	0

## Sheet: Codes
SPSS_code	Pot codes							Soak codes
1	NG=Norwegian green twine entrance							1 = 1-24 hours
2	NLM= Norwegian large mono entrance							2 = 25-48 hours
3	NSM= Norwegian small mono entrance							3 = 49-72 hours
4	WG=Wire green twine entrance
5	WLM= Wire large mono entrance
6	WSM= Wire small mono entrance
