# Supplementary material for: A feasibility study to determine the use of baited pots in Greenland halibut (Reinhardtius hippoglossoides) fisheries, supported by the use of underwater video observations
Source: PeerJ. 2021 Jan 4;9:e10536. doi: 10.7717/peerj.10536 (PMC7789868; doi:10.7717/peerj.10536)
Supplement: Supplemental Information 4 [file peerj-09-10536-s004.xlsx]

## Sheet: video data
date	video_num	pot_type	NAFO Division	current_direction	approach_direction	approach_time (mm:ss)	species	approach _direction_relative_ to_current	flee_time (mm:ss)	Entrance (R/L)	interaction (y/n)	entry attempt (y/n)	entangle_flee (y/n)	Entrance Funnel entangle	Parlour entangle	Entrance chamber entangle	Parlour entrance entangle	Outter side panel entangle	sucessful entry (y/n)	entry time	Parlour entry (y/n)	Parlour entry time	exits pot(y/n)	exit time	exits top chamber	exit top time	immed_behaviour_Entrance chamber	immed_behaviour_Parlour
Oct. 12/13, 2016	137	N 50mm	0B	DL	L	00:05:51	Greenland halibut	us	00:01:08		y	y	n	0	0	0	0	0	n		n		n		n
Oct. 12/13, 2016	137	N 50mm	0B	DL	DL	00:07:26	Greenland halibut	us	00:00:34		n	n	n	0	0	0	0	0	n		n		n		n
Oct. 12/13, 2016	137	N 50mm	0B	DL	L	00:09:42	Greenland halibut	us	00:00:06		n	n	n	0	0	0	0	0	n		n		n		n
Oct. 12/13, 2016	137	N 50mm	0B	DL	DR	00:10:00	Greenland halibut	ds	00:00:20		n	n	n	0	0	0	0	0	n		n		n		n
Oct. 12/13, 2016	137	N 50mm	0B	DL	L	00:10:23	Greenland halibut	us	00:03:14		y	y	y	1	0	0	0	0	n		n		n		n
Oct. 12/13, 2016	137	N 50mm	0B	DL	D	00:23:28	Greenland halibut	us	00:00:23		n	n	n	0	0	0	0	0	n		n		n		n
Oct. 12/13, 2016	137	N 50mm	0B	DL	L	00:24:04	Greenland halibut	us	00:00:05		n	n	n	0	0	0	0	0	n		n		n		n
Oct. 12/13, 2016	137	N 50mm	0B	DL	U	00:24:30	Greenland halibut	ds	00:00:08		n	n	n	0	0	0	0	0	n		n		n		n
Oct. 12/13, 2016	137	N 50mm	0B	DL	L	00:25:00	Greenland halibut	us	00:00:10		n	n	n	0	0	0	0	0	n		n		n		n
Oct. 12/13, 2016	137	N 50mm	0B	DL	U	00:25:40	Greenland halibut	ds	00:00:26		n	n	n	0	0	0	0	0	n		n		n		n
Oct. 12/13, 2016	137	N 50mm	0B	DL	DL	00:28:10	Greenland halibut	us	00:00:53		n	n	n	0	0	0	0	0	n		n		n		n
Oct. 12/13, 2016	139	N 50mm	0B	DL	DL	00:00:25	Greenland halibut	us	00:00:22		n	n	n	0	0	0	0	0	n		n		n		n
Oct. 12/13, 2016	139	N 50mm	0B	DL	L	00:01:59	Greenland halibut	us	00:00:25		y	y	n	0	0	0	0	0	n		n		n		n
Oct. 12/13, 2016	139	N 50mm	0B	DL	UL	00:03:35	Greenland halibut	cc	00:00:35		n	n	n	0	0	0	0	0	n		n		n		n
Oct. 12/13, 2016	139	N 50mm	0B	DL	L	00:05:35	Greenland halibut	us	00:01:43		y	y	n	0	0	0	0	0	n		n		n		n
Oct. 12/13, 2016	139	N 50mm	0B	DL	L	00:11:17	Greenland halibut	us	00:00:14		y	y	y	1	0	0	0	0	n		n		n		n
Oct. 12/13, 2016	139	N 50mm	0B	DL	D	00:18:25	Greenland halibut	us	00:00:12		n	n	n	0	0	0	0	0	n		n		n		n
Oct. 12/13, 2016	139	N 50mm	0B	DL	D	00:19:00	Greenland halibut	us	00:00:50		y	y	n	0	0	0	0	0	n		n		n		n
Oct. 12/13, 2016	139	N 50mm	0B	DL	UL	00:20:04	Greenland halibut	cc	00:01:11		n	n	n	0	0	0	0	0	n		n		n		n
Oct. 12/13, 2016	139	N 50mm	0B	DL	DL	00:25:10	Greenland halibut	us	00:00:17		n	n	n	0	0	0	0	0	n		n		n		n
Oct. 12/13, 2016	141	N 50mm	0B	DL	D	00:11:36	Greenland halibut	us	00:00:23		n	n	n	0	0	0	0	0	n		n		n		n
Oct. 12/13, 2016	141	N 50mm	0B	DL	UR	00:15:14	Greenland halibut	ds	00:00:25		n	n	n	0	0	0	0	0	n		n		n		n
Oct. 12/13, 2016	141	N 50mm	0B	DL	DL	00:16:13	Greenland halibut	us	00:00:19		n	n	n	0	0	0	0	0	n		n		n		n
Oct. 12/13, 2016	141	N 50mm	0B	DL	UL	00:24:42	Greenland halibut	cc	00:00:19		y	n	n	0	0	0	0	0	n		n		n		n
Oct. 12/13, 2016	143	N 50mm	0B	DL	DL	00:01:35	Greenland halibut	us	00:00:08		n	n	n	0	0	0	0	0	n		n		n		n
Oct. 12/13, 2016	143	N 50mm	0B	DL	R	00:04:27	Rockling sp.	ds		R		y	n	0	1	0	0	0	y	00:07:00	y	00:28:37	n		n		aggressive	neutral
Oct. 12/13, 2016	145	N 50mm	0B	L	D	00:14:26	Greenland halibut	cc	00:00:19		n	n	n	0	0	0	0	0	n		n		n		n
Oct. 12/13, 2016	145	N 50mm	0B	L	L	00:21:03	Greenland halibut	us	00:01:36	L	y	y	n	0	0	0	0	0	y	00:00:10	n		y	00:00:26	n		aggressive
Oct. 12/13, 2016	149	N 50mm	0B	L	L	00:04:48	Rock grenadier	us	00:00:19			n	n	0	0	0	0	0	n		n		n		n
Oct. 12/13, 2016	151	N 50mm	0B	L	U	00:03:33	Skate	cc	00:00:07			n	n	0	0	0	0	0	n		n		n		n
Oct. 12/13, 2016	111	N 50mm	0B	UL	UR	00:19:16	Rock grenadier	cc	00:03:21			n	n	0	0	0	0	0	n		n		n		n
Oct. 12/13, 2016	111	N 50mm	0B	UL	UL	00:22:16	Greenland halibut	us	00:00:08		n	n	n	0	0	0	0	0	n		n		n		n
Oct. 12/13, 2016	111	N 50mm	0B	UL	U	00:22:53	Rock grenadier	us	00:00:47			n	n	0	0	0	0	0	n		n		n		n
Oct. 12/13, 2016	111	N 50mm	0B	UL	U	00:24:18	Rock grenadier	us	00:00:34			n	n	0	0	0	0	0	n		n		n		n
Oct. 12/13, 2016	111	N 50mm	0B	UL	U	00:24:40	Greenland halibut	us	00:00:10		n	n	n	0	0	0	0	0	n		n		n		n
Oct. 12/13, 2016	111	N 50mm	0B	L	U	00:28:06	Greenland halibut	us	00:00:26	L	y	y	n	0	0	0	0	0	y	00:00:16	n		y	00:00:05	n		neutral
Oct. 12/13, 2016	111	N 50mm	0B	UL	U	00:27:31	Greenland halibut	us	00:03:30		n	n	n	0	0	0	0	0	n		n		n		n
Oct. 12/13, 2016	113	N 50mm	0B	UL	UL	00:00:38	Greenland halibut	us	00:00:52		n	n	n	0	0	0	0	0	n		n		n		n
Oct. 12/13, 2016	113	N 50mm	0B	UL	U	00:05:07	Greenland halibut	us		R	y	y	n	2	1	1	4	0	y	00:01:41	y	1:25:02	n		n		aggressive	neutral
Oct. 12/13, 2016	113	N 50mm	0B	UL	L	00:06:18	Rock grenadier	us	00:00:06			n	n	0	0	0	0	0	n		n		n		n
Oct. 12/13, 2016	113	N 50mm	0B	UL	U	00:11:16	Greenland halibut	us	00:00:29		n	n	n	0	0	0	0	0	n		n		n		n
Oct. 12/13, 2016	113	N 50mm	0B	UL	DL	00:16:00	Greenland halibut	cc	00:00:50		n	n	n	0	0	0	0	0	n		n		n		n
Oct. 12/13, 2016	113	N 50mm	0B	UL	UL	00:17:27	Greenland halibut	us	00:01:26		y	y	n	0	0	0	0	0	n		n		n		n
Oct. 12/13, 2016	113	N 50mm	0B	UL	L	00:21:08	Greenland halibut	us	00:00:12		n	n	n	0	0	0	0	0	n		n		n		n
Oct. 12/13, 2016	113	N 50mm	0B	UL	DL	00:24:53	Rockling sp.	cc	00:00:04			n	n	0	0	0	0	0	n		n		n		n
Oct. 12/13, 2016	113	N 50mm	0B	UL	D	00:25:12	Rockling sp.	ds	00:00:11			n	n	0	0	0	0	0	n		n		n		n
Oct. 12/13, 2016	113	N 50mm	0B	UL	L	00:27:09	Rock grenadier	us	00:00:43			n	n	0	0	0	0	0	n		n		n		n
Oct. 12/13, 2016	113	N 50mm	0B	UL	UL	00:27:34	Greenland halibut	us	00:00:18		n	n	n	0	0	0	0	0	n		n		n		n
Oct. 12/13, 2016	115	N 50mm	0B	UL	U	00:00:28	Greenland halibut	us	00:00:01		n	n	n	0	0	0	0	0	n		n		n		n
Oct. 12/13, 2016	115	N 50mm	0B	UL	L	00:00:33	Greenland halibut	us	00:00:29		n	n	n	0	0	0	0	0	n		n		n		n
Oct. 12/13, 2016	115	N 50mm	0B	UL	U	00:13:59	Rock grenadier	us	00:00:14			n	n	0	0	0	0	0	n		n		n		n
Oct. 12/13, 2016	115	N 50mm	0B	UL	L	00:16:19	Greenland halibut	us		L	y	y	n	1	3	0	1	0	y	00:00:20	y	01:16:25	n		n		aggressive	aggressive
Oct. 12/13, 2016	117	N 50mm	0B	UL	U	00:00:40	Wolffish	us	00:10:05			n	n	0	0	0	0	0	n		n		n		n
Oct. 12/13, 2016	117	N 50mm	0B	UL	U	00:12:27	Wolffish	us	00:03:08			n	n	0	0	0	0	0	n		n		n		n
Oct. 12/13, 2016	117	N 50mm	0B	UL	L	00:15:11	Greenland halibut	us	00:00:19		n	n	n	0	0	0	0	0	n		n		n		n
Oct. 12/13, 2016	117	N 50mm	0B	UL	U	00:18:05	Wolffish	us	00:02:05			n	n	0	0	0	0	0	n		n		n		n
Oct. 12/13, 2016	117	N 50mm	0B	UL	L	00:24:38	Greenland halibut	us	00:00:12		n	n	n	0	0	0	0	0	n		n		n		n
Oct. 12/13, 2016	117	N 50mm	0B	UL	R	00:25:30	Greenland halibut	cc	00:00:02		n	n	n	0	0	0	0	0	n		n		n		n
Oct. 12/13, 2016	117	N 50mm	0B	UL	L	00:28:24	Greenland halibut	us	00:00:22		y	y	n	0	0	0	0	0	n		n		n		n
Oct. 12/13, 2016	117	N 50mm	0B	UL	L	00:29:27	Greenland halibut	us	00:00:14		y	y	n	0	0	0	0	0	n		n		n		n
Oct. 12/13, 2016	117	N 50mm	0B	UL	L	00:29:46	Greenland halibut	us	00:00:14		n	n	n	0	0	0	0	0	n		n		n		n
Oct. 12/13, 2016	119	N 50mm	0B	UL	R	00:15:12	Greenland halibut	cc	00:00:01		n	n	n	0	0	0	0	0	n		n		n		n
Oct. 12/13, 2016	119	N 50mm	0B	UL	UL	00:20:26	Greenland halibut	us	00:00:13		n	n	n	0	0	0	0	0	n		n		n		n
Oct. 12/13, 2016	119	N 50mm	0B	UL	DL	00:21:40	Greenland halibut	cc	00:00:15		n	n	n	0	0	0	0	0	n		n		n		n
Oct. 12/13, 2016	119	N 50mm	0B	UL	DR	00:22:10	Greenland halibut	ds	00:00:05		n	n	n	0	0	0	0	0	n		n		n		n
Oct. 12/13, 2016	119	N 50mm	0B	UL	DL	00:23:09	Greenland halibut	us	00:00:23		n	n	n	0	0	0	0	0	n		n		n		n
Oct. 12/13, 2016	119	N 50mm	0B	UL	DL	00:25:11	Greenland halibut	us		L	y	y	n	1	0	0	0	0	y	00:00:29	n		n		n		aggressive
Oct. 12/13, 2016	119	N 50mm	0B	UL	U	00:25:17	Wolffish	us	00:04:17			n	n	0	0	0	0	0	n		n		n		n
Oct. 12/13, 2016	121	N 50mm	0B	UL	L	00:02:04	Roughhead grenadier	us	00:00:15			n	n	0	0	0	0	0	n		n		n		n
Oct. 12/13, 2016	121	N 50mm	0B	UL	R	00:07:20	Wolffish	ds	00:01:40			n	n	0	0	0	0	0	n		n		n		n
Oct. 12/13, 2016	121	N 50mm	0B	UL	DL	00:12:50	Greenland halibut	cc	00:00:46		n	n	n	0	0	0	0	0	n		n		n		n
Oct. 12/13, 2016	121	N 50mm	0B	UL	L	00:15:01	Wolffish	us	00:00:09			n	n	0	0	0	0	0	n		n		n		n
Oct. 12/13, 2016	121	N 50mm	0B	UL	D	00:18:05	Rockling sp.	ds	00:00:08			n	n	0	0	0	0	0	n		n		n		n
Oct. 12/13, 2016	121	N 50mm	0B	UL	D	00:18:20	Rockling sp.	ds	00:00:07			n	n	0	0	0	0	0	n		n		n		n
Oct. 12/13, 2016	121	N 50mm	0B	UL	UR	00:27:55	Wolffish	cc	00:01:51			n	n	0	0	0	0	0	n		n		n		n
Oct. 12/13, 2016	123	N 50mm	0B	L	R	00:07:00	Wolffish	ds	00:00:40			n	n	0	0	0	0	0	n		n		n		n
Oct. 12/13, 2016	123	N 50mm	0B	L	DR	00:18:45	Wolffish	ds	00:01:15			n	n	0	0	0	0	0	n		n		n		n
Oct. 12/13, 2016	123	N 50mm	0B	L	U	00:23:30	Wolffish	cc	00:00:05			n	n	0	0	0	0	0	n		n		n		n
Oct. 12/13, 2016	125	N 50mm	0B	L	L	00:05:33	Roughhead grenadier	us	00:00:10			n	n	0	0	0	0	0	n		n		n		n
Oct. 12/13, 2016	125	N 50mm	0B	L	U	00:06:01	Roughhead grenadier	cc	00:00:19			n	n	0	0	0	0	0	n		n		n		n
Oct. 12/13, 2016	125	N 50mm	0B	L	L	00:07:27	Roughhead grenadier	us	00:00:18			n	n	0	0	0	0	0	n		n		n		n
Oct. 12/13, 2016	125	N 50mm	0B	L	U	00:08:14	Roughhead grenadier	cc	00:01:06			n	n	0	0	0	0	0	n		n		n		n
Oct. 12/13, 2016	125	N 50mm	0B	L	UR	00:10:02	Greenland halibut	ds	00:00:05		n	n	n	0	0	0	0	0	n		n		n		n
Oct. 12/13, 2016	125	N 50mm	0B	L	DL	00:10:20	Greenland halibut	us	00:00:18		n	n	n	0	0	0	0	0	n		n		n		n
Oct. 12/13, 2016	125	N 50mm	0B	L	UR	00:11:16	Greenland halibut	ds	00:00:39		n	n	n	0	0	0	0	0	n		n		n		n
Oct. 12/13, 2016	125	N 50mm	0B	L	D	00:12:51	Greenland halibut	cc	00:00:16		n	n	n	0	0	0	0	0	n		n		n		n
Oct. 12/13, 2016	125	N 50mm	0B	L	UL	00:16:00	Greenland halibut	us	00:00:04		n	n	n	0	0	0	0	0	n		n		n		n
Oct. 12/13, 2016	125	N 50mm	0B	L	L	00:22:12	Wolffish	us	00:01:30			n	n	0	0	0	0	0	n		n		n		n
Oct. 12/13, 2016	125	N 50mm	0B	L	L	00:26:26	Wolffish	us	00:03:22			n	n	0	0	0	0	0	n		n		n		n
Oct. 12/13, 2016	125	N 50mm	0B	L	L	00:26:37	Roughhead grenadier	us	00:01:54			n	n	0	0	0	0	1	n		n		n		n
Oct. 12/13, 2016	127	N 50mm	0B	L	UL	00:02:35	Greenland halibut	us	00:00:16		n	n	n	0	0	0	0	0	n		n		n		n
Oct. 12/13, 2016	127	N 50mm	0B	L	L	00:04:01	Wolffish	us	00:05:04			n	n	0	0	0	0	0	n		n		n		n
Oct. 12/13, 2016	127	N 50mm	0B	L	UL	00:13:13	Greenland halibut	us	00:00:03		n	n	n	0	0	0	0	0	n		n		n		n
Oct. 12/13, 2016	127	N 50mm	0B	L	UL	00:15:31	Greenland halibut	us	00:00:31		y	y	n	0	0	0	0	0	n		n		n		n
Oct. 12/13, 2016	127	N 50mm	0B	L	L	00:17:48	Greenland halibut	us	00:00:13		y	y	n	0	0	0	0	0	n		n		n		n
Oct. 12/13, 2016	127	N 50mm	0B	L	DR	00:18:18	Greenland halibut	ds	00:00:02		y	y	n	0	0	0	0	0	n		n		n		n
Oct. 12/13, 2016	127	N 50mm	0B	L	U	00:18:37	Greenland halibut	cc	00:00:09		n	n	n	0	0	0	0	0	n		n		n		n
Oct. 12/13, 2016	127	N 50mm	0B	L	L	00:19:30	Greenland halibut	us	00:00:09		n	n	n	0	0	0	0	0	n		n		n		n
Oct. 12/13, 2016	127	N 50mm	0B	L	U	00:21:00	Greenland halibut	cc	00:00:20		n	n	n	0	0	0	0	0	n		n		n		n
Oct. 12/13, 2016	127	N 50mm	0B	L	U	00:22:40	Wolffish	cc	00:00:50			n	n	0	0	0	0	0	n		n		n		n
Oct. 12/13, 2016	127	N 50mm	0B	L	DL	00:25:30	Greenland halibut	us	00:00:04		n	n	n	0	0	0	0	0	n		n		n		n
Oct. 12/13, 2016	127	N 50mm	0B	L	R	00:27:06	Greenland halibut	ds	00:00:02		n	n	n	0	0	0	0	0	n		n		n		n
Oct. 12/13, 2016	127	N 50mm	0B	L	DL	00:27:30	Wolffish	us	00:04:18			n	n	0	0	0	0	0	n		n		n		n
Oct. 12/13, 2016	129	N 50mm	0B	L	D	00:09:50	Wolffish	cc	00:00:15			n	n	0	0	0	0	0	n		n		n		n
Oct. 12/13, 2016	129	N 50mm	0B	L	L	00:11:01	Greenland halibut	us	00:00:02		n	n	n	0	0	0	0	0	n		n		n		n
Oct. 12/13, 2016	129	N 50mm	0B	L	DR	00:11:35	Greenland halibut	ds	00:00:02		n	n	n	0	0	0	0	0	n		n		n		n
Oct. 12/13, 2016	129	N 50mm	0B	L	L	00:12:27	Greenland halibut	us	00:00:03		n	n	n	0	0	0	0	0	n		n		n		n
Oct. 12/13, 2016	129	N 50mm	0B	L	L	00:13:52	Wolffish	us		L		y	n	0	5	0	1	0	y	00:00:34	y	00:25:03	n		n		aggressive	aggressive
Oct. 12/13, 2016	129	N 50mm	0B	L	L	00:14:03	Wolffish	us	00:00:17			n	n	0	0	0	0	0	n		n		n		n
Oct. 12/13, 2016	129	N 50mm	0B	L	D	00:14:50	Wolffish	cc	00:00:15			n	n	0	0	0	0	0	n		n		n		n
Oct. 12/13, 2016	129	N 50mm	0B	L	L	00:17:00	Wolffish	us	00:00:18			n	n	0	0	0	0	0	n		n		n		n
Oct. 12/13, 2016	129	N 50mm	0B	L	UL	00:20:47	Wolffish	us	00:01:02			n	n	0	0	0	0	0	n		n		n		n
Oct. 12/13, 2016	129	N 50mm	0B	L	L	00:22:21	Wolffish	us	00:00:41			n	n	0	0	0	0	0	n		n		n		n
Oct. 12/13, 2016	129	N 50mm	0B	L	DL	00:23:11	Wolffish	us	00:00:40			n	n	0	0	0	0	0	n		n		n		n
Oct. 12/13, 2016	129	N 50mm	0B	L	U	00:24:25	Wolffish	cc	00:00:15			n	n	0	0	0	0	0	n		n		n		n
Oct. 12/13, 2016	129	N 50mm	0B	L	R	00:26:11	Wolffish	ds	00:00:29			n	n	0	0	0	0	0	n		n		n		n
Oct. 12/13, 2016	131	N 50mm	0B	L	L	00:00:20	Greenland halibut	us	00:00:13		y	y	n	0	0	0	0	0	n		n		n		n
Oct. 12/13, 2016	131	N 50mm	0B	L	UR	00:17:59	Wolffish	ds	00:00:33			n	n	0	0	0	0	0	n		n		n		n
Oct. 12/13, 2016	131	N 50mm	0B	L	DL	00:28:00	Greenland halibut	us	00:01:46		n	n	n	0	0	0	0	0	n		n		n		n
Oct. 12/13, 2016	133	N 50mm	0B	DL	L	00:19:41	Greenland halibut	us	00:00:22		n	n	n	0	0	0	0	0	n		n		n		n
Oct. 12/13, 2016	133	N 50mm	0B	DL	U	00:19:53	Greenland halibut	ds	00:00:08		n	n	n	0	0	0	0	0	n		n		n		n
Oct. 12/13, 2016	135	N 50mm	0B	DL	DR	00:06:08	Greenland halibut	cc	00:03:26	R	y	y	n	0	0	0	0	0	y	00:00:04	n		y	00:03:20	n		aggressive
Oct. 12/13, 2016	145	N 50mm	0B	L	D	00:14:26	Greenland halibut	cc	00:00:19		n	n	n	0	0	0	0	0	n		n		n		n
Oct. 12/13, 2016	145	N 50mm	0B	L	L	00:21:03	Greenland halibut	us	00:01:36	L	y	y	n	0	0	0	0	0	y	00:00:10	n		y	00:00:26	n		aggresive
Oct. 12/13, 2016	153	N 50mm	0B	UL	L	00:01:58	Greenland halibut	us	00:00:34	L	y	y	n	1	0	0	0	0	y	00:00:08	n		y	00:00:22	n		aggressive
Oct. 12/13, 2016	155	N 50mm	0B	UL	DL	00:00:37	Greenland halibut	cc	00:00:25		n	n	n	0	0	0	0	0	n		n		n		n
Oct. 12/13, 2016	155	N 50mm	0B	UL	U	00:06:58	Greenland halibut	us	00:00:06		n	n	n	0	0	0	0	0	n		n		n		n
Oct. 12/13, 2016	157	N 50mm	0B	UL	UR	00:04:24	Greenland halibut	cc		R	y	y	n	4	0	0	3	0	y	00:00:06	n		n		n		aggressive
Oct. 12/13, 2016	157	N 50mm	0B	UL	UL	00:27:07	Wolffish	us	00:02:30			n	n	0	0	0	0	0	n		n		n		n
Oct. 8/9 2016	22	N 50mm	0B	L	U	00:26:58	Rockling sp.	cc	00:00:18			n	n	0	0	0	0	0	n		n		n		n
Oct. 8/9 2016	22	N 50mm	0B	L	L	00:27:22	Rockling sp.	us	00:00:06			n	n	0	0	0	0	0	n		n		n		n
Oct. 8/9 2016	22	N 50mm	0B	L	L	00:27:22	Rockling sp.	us	00:00:08			n	n	0	0	0	0	0	n		n		n		n
Oct. 8/9 2016	22	N 50mm	0B	L	L	00:27:32	Rockling sp.	us	00:07:35	L		y	n	0	0	0	0	0	y	00:00:16	n		y	00:07:19	n		neautral
Oct. 8/9 2016	22	N 50mm	0B	L	L	00:27:51	Rockling sp.	us	00:00:15			n	n	0	0	0	0	0	n		n		n		n
Oct. 8/9 2016	22	N 50mm	0B	L	L	00:27:59	Rockling sp.	us		L		y	n	0	1	0	0	0	y	00:00:03	y	00:27:39	n		n		neutral	neutral
Oct. 8/9 2016	22	N 50mm	0B	L	L	00:28:31	Rockling sp.	us		L		y	n	0	0	1	0	0	y	00:00:17	n		n		n		aggressive
Oct. 8/9 2016	23	N 50mm	0B	L	U	00:00:06	Rockling sp.	cc	00:00:05			n	n	0	0	0	0	0	n		n		n		n
Oct. 8/9 2016	23	N 50mm	0B	L	UL	00:01:29	Greenland halibut	us	00:02:21		y	y	y	1	0	0	0	0	n		n		n		n
Oct. 8/9 2016	23	N 50mm	0B	L	L	00:05:23	Greenland halibut	us	00:02:21		y	y	y	1	0	0	0	0	n		n		n		n
Oct. 8/9 2016	23	N 50mm	0B	L	L	00:08:35	Greenland halibut	us	00:00:37		y	y	n	0	0	0	0	0	n		n		n		n
Oct. 8/9 2016	23	N 50mm	0B	L	UL	00:13:56	Greenland halibut	us		L	y	y	n	5	8	0	4	0	y	00:00:25	y	00:10:41	n		n		aggressive	neutral
Oct. 8/9 2016	23	N 50mm	0B	L	L	00:20:49	Greenland halibut	us	00:00:02		n	n	n	0	0	0	0	0	n		n		n		n
Oct. 8/9 2016	23	N 50mm	0B	L	DR	00:21:50	Greenland halibut	ds	00:00:03		n	n	n	0	0	0	0	0	n		n		n		n
Oct. 8/9 2016	23	N 50mm	0B	L	UL	00:22:08	Greenland halibut	us	00:00:17		n	n	n	0	0	0	0	0	n		n		n		n
Oct. 8/9 2016	23	N 50mm	0B	L	L	00:24:42	Roughhead grenadier	us		L		y	n	3	0	1	12	0	y	00:00:04	n		y	04:12:38	n		aggressive
Oct. 8/9 2016	23	N 50mm	0B	L	UL	00:25:36	Greenland halibut	us	00:00:08		y	n	n	0	0	0	0	0	n		n		n		n
Oct. 8/9 2016	23	N 50mm	0B	L	L	00:27:30	Greenland halibut	us	00:00:23		y	y	n	0	0	0	0	0	n		n		n		n
Oct. 8/9 2016	24	N 50mm	0B	UL	U	00:02:46	Greenland halibut	us	00:00:23		y	n	n	0	0	0	0	0	n		n		n		n
Oct. 8/9 2016	25	N 50mm	0B	UL	UL	00:25:28	Greenland halibut	us	00:00:05		n	n	n	0	0	0	0	0	n		n		n		n
Oct. 8/9 2016	25	N 50mm	0B	UL	U	00:25:51	Roughhead grenadier	us	00:00:10			n	n	0	0	0	0	0	n		n		n		n
Oct. 8/9 2016	25	N 50mm	0B	UL	U	00:27:15	Roughhead grenadier	us	00:00:19			n	n	0	0	0	0	0	n		n		n		n
Oct. 8/9 2016	25	N 50mm	0B	UL	U	00:27:50	Roughhead grenadier	us	00:00:13			n	n	0	0	0	0	0	n		n		n		n
Oct. 8/9 2016	25	N 50mm	0B	UL	R	00:29:46	Greenland halibut	ds	00:00:01		n	n	n	0	0	0	0	0	n		n		n		n
Oct. 8/9 2016	26	N 50mm	0B	U	UR	00:00:39	Greenland halibut	us	00:00:02		n	n	n	0	0	0	0	0	n		n		n		n
Oct. 8/9 2016	26	N 50mm	0B	U	U	00:01:02	Roughhead grenadier	us	00:00:06			n	n	0	0	0	0	0	n		n		n		n
Oct. 8/9 2016	26	N 50mm	0B	U	U	00:01:00	Greenland halibut	us	00:00:12		n	n	n	0	0	0	0	0	n		n		n		n
Oct. 8/9 2016	26	N 50mm	0B	U	U	00:01:17	Greenland halibut	us	00:00:07		n	n	n	0	0	0	0	0	n		n		n		n
Oct. 8/9 2016	26	N 50mm	0B	U	U	00:01:31	Roughhead grenadier	us	00:00:14			n	n	0	0	0	0	0	n		n		n		n
Oct. 8/9 2016	26	N 50mm	0B	U	U	00:01:39	Roughhead grenadier	us	00:00:08			n	n	0	0	0	0	0	n		n		n		n
Oct. 8/9 2016	26	N 50mm	0B	U	DL	00:01:45	Greenland halibut	ds	00:00:18		y	y	n	0	0	0	0	0	n		n		n		n
Oct. 8/9 2016	26	N 50mm	0B	U	U	00:03:12	Greenland halibut	us	00:00:01		y	n	n	0	0	0	0	0	n		n		n		n
Oct. 8/9 2016	26	N 50mm	0B	U	U	00:04:18	Roughhead grenadier	us	00:00:09			n	n	0	0	0	0	0	n		n		n		n
Oct. 8/9 2016	26	N 50mm	0B	U	U	00:04:52	Greenland halibut	us	00:00:05		y	n	n	0	0	0	0	0	n		n		n		n
Oct. 8/9 2016	26	N 50mm	0B	U	UR	00:05:39	Roughhead grenadier	us	00:00:05			n	n	0	0	0	0	0	n		n		n		n
Oct. 8/9 2016	26	N 50mm	0B	U	U	00:07:44	Greenland halibut	us	00:00:24		y	y	n	0	0	0	0	0	n		n		n		n
Oct. 8/9 2016	26	N 50mm	0B	U	U	00:08:48	Greenland halibut	us	00:00:29		y	n	n	0	0	0	0	0	n		n		n		n
Oct. 8/9 2016	26	N 50mm	0B	U	U	00:10:26	Greenland halibut	us	00:01:28		y	n	n	0	0	0	0	0	n		n		n		n
Oct. 8/9 2016	26	N 50mm	0B	U	R	00:22:09	Greenland halibut	cc	00:00:20		y	y	y	1	0	0	0	0	n		n		n		n
Oct. 8/9 2016	27	N 50mm	0B	U	U	00:09:23	Rockling sp.	us	00:00:06			n	n	0	0	0	0	0	n		n		n		n
Oct. 8/9 2016	27	N 50mm	0B	U	D	00:24:20	Rockling sp.	ds	00:00:03			n	n	0	0	0	0	0	n		n		n		n
Oct. 8/9 2016	28	N 50mm	0B	U	DR	00:06:20	Rockling sp.	ds	00:00:09			n	n	0	0	0	0	0	n		n		n		n
Oct. 8/9 2016	28	N 50mm	0B	U	UR	00:07:44	Greenland halibut	us	00:00:12		y	y	n	0	0	0	0	0	n		n		n		n
Oct. 8/9 2016	30	N 50mm	0B	UR	UR	00:25:51	Wolffish	us	00:40:27			n	n	1	0	0	0	3	n		n		n		n
Oct. 8/9 2016	31	N 50mm	0B	UR	U	00:02:33	Wolffish	us	00:07:00			n	n	0	0	0	0	3	n		n		n		n
Oct. 8/9 2016	31	N 50mm	0B	L	L	00:26:07	Rockling sp.	us		L		y	n	0	0	0	0	0	y	00:00:03	n		n		n		aggressive
Oct. 8/9 2016	31	N 50mm	0B	L	UL	00:29:31	Rockling sp.	us	00:00:13			n	n	0	0	0	0	0	n		n		n		n
Oct. 8/9 2016	32	N 50mm	0B	UL	R	00:04:25	Wolffish	ds	00:04:16			n	n	0	0	0	0	0	n		n		n		n
Oct. 8/9 2016	32	N 50mm	0B	UL	U	00:12:10	Wolffish	us	00:04:03			n	n	0	0	0	0	0	n		n		n		n
Oct. 8/9 2016	32	N 50mm	0B	UL	DL	00:16:30	Wolffish	cc	00:04:12			n	n	0	0	0	0	0	n		n		n		n
Oct. 8/9 2016	32	N 50mm	0B	UL	UR	00:17:00	Wolffish	cc	00:01:13			n	n	0	0	0	0	0	n		n		n		n
Oct. 8/9 2016	32	N 50mm	0B	UL	R	00:19:26	Wolffish	ds	00:00:34			n	n	0	0	0	0	0	n		n		n		n
Oct. 8/9 2016	32	N 50mm	0B	UL	DR	00:24:21	Wolffish	ds	00:00:19			n	n	0	0	0	0	0	n		n		n		n
Oct. 8/9 2016	33	N 50mm	0B	U	U	00:08:54	Greenland halibut	us	00:00:32		n	n	n	0	0	0	0	0	n		n		n		n
Oct. 8/9 2016	33	N 50mm	0B	U	D	00:10:47	Wolffish	ds	00:02:27			n	n	0	0	0	0	0	n		n		n		n
Oct. 8/9 2016	33	N 50mm	0B	U	UR	00:12:11	Greenland halibut	us	00:00:51		n	n	n	0	0	0	0	0	n		n		n		n
Oct. 8/9 2016	33	N 50mm	0B	U	U	00:14:20	Greenland halibut	us	00:00:03		n	n	n	0	0	0	0	0	n		n		n		n
Oct. 8/9 2016	33	N 50mm	0B	U	U	00:17:45	Greenland halibut	us	00:00:15		n	n	n	0	0	0	0	0	n		n		n		n
Oct. 8/9 2016	33	N 50mm	0B	U	DR	00:20:34	Wolffish	ds	00:00:05			n	n	0	0	0	0	0	n		n		n		n
Oct. 8/9 2016	34	N 50mm	0B	U	U	00:05:45	Wolffish	us	00:01:00			n	n	0	0	0	0	0	n		n		n		n
Oct. 8/9 2016	34	N 50mm	0B	U	U	00:06:45	Greenland halibut	us	00:00:20		n	n	n	0	0	0	0	0	n		n		n		n
Oct. 8/9 2016	34	N 50mm	0B	U	U	00:07:25	Wolffish	us	00:02:53			n	n	0	0	0	0	0	n		n		n		n
Oct. 8/9 2016	34	N 50mm	0B	U	U	00:10:56	Wolffish	us	00:00:08			n	n	0	0	0	0	0	n		n		n		n
Oct. 8/9 2016	34	N 50mm	0B	U	UR	00:11:35	Wolffish	us	00:00:39			n	n	0	0	0	0	0	n		n		n		n
Oct. 8/9 2016	34	N 50mm	0B	U	UL	00:15:42	Wolffish	us	00:00:16			n	n	0	0	0	0	0	n		n		n		n
Oct. 8/9 2016	34	N 50mm	0B	U	U	00:15:59	Wolffish	us	00:14:44			n	n	0	0	0	0	0	n		n		n		n
Oct. 8/9 2016	34	N 50mm	0B	U	DL	00:16:08	Wolffish	ds	00:00:45			n	n	0	0	0	0	0	n		n		n		n
Oct. 8/9 2016	34	N 50mm	0B	U	L	00:19:55	Wolffish	cc	00:04:06			n	n	0	0	0	0	1	n		n		n		n
Oct. 8/9 2016	34	N 50mm	0B	U	U	00:24:00	Wolffish	us	00:03:40			n	n	0	0	0	0	1	n		n		n		n
Oct. 8/9 2016	35	N 50mm	0B	U	U	00:00:03	Wolffish	us	00:04:34			n	n	0	0	0	0	0	n		n		n		n
Oct. 8/9 2016	35	N 50mm	0B	U	UL	00:03:12	Greenland halibut	us	00:00:13		n	n	n	0	0	0	0	0	n		n		n		n
Oct. 8/9 2016	35	N 50mm	0B	U	DL	00:04:24	Greenland halibut	ds	00:00:03		n	n	n	0	0	0	0	0	n		n		n		n
Oct. 8/9 2016	35	N 50mm	0B	U	DL	00:05:20	Wolffish	ds	00:04:40			n	n	0	0	0	0	0	n		n		n		n
Oct. 8/9 2016	35	N 50mm	0B	U	L	00:05:35	Wolffish	cc	00:00:20			n	n	0	0	0	0	0	n		n		n		n
Oct. 8/9 2016	35	N 50mm	0B	U	U	00:06:00	Greenland halibut	us		L	y	y	n	1	0	3	6	0	y	00:00:30	n		n		n		aggressive
Oct. 8/9 2016	35	N 50mm	0B	U	UL	00:11:00	Wolffish	us	00:00:54			n	n	0	0	0	0	0	n		n		n		n
Oct. 8/9 2016	35	N 50mm	0B	U	DL	00:12:45	Wolffish	ds	00:01:04			n	n	0	0	0	0	0	n		n		n		n
Oct. 8/9 2016	35	N 50mm	0B	U	D	00:14:30	Wolffish	ds	00:02:50			n	n	0	0	0	0	0	n		n		n		n
Oct. 8/9 2016	35	N 50mm	0B	U	DR	00:19:53	Wolffish	ds	00:00:37			n	n	0	0	0	0	0	n		n		n		n
Oct. 8/9 2016	35	N 50mm	0B	U	UR	00:21:40	Wolffish	us	00:01:04			n	n	0	0	0	0	0	n		n		n		n
Oct. 8/9 2016	35	N 50mm	0B	U	DL	00:23:12	Wolffish	ds	00:30:30			n	n	0	0	0	0	2	n		n		n		n
Oct. 8/9 2016	35	N 50mm	0B	U	R	00:25:40	Greenland halibut	cc	00:00:04		n	n	n	0	0	0	0	0	n		n		n		n
Oct. 8/9 2016	35	N 50mm	0B	U	U	00:27:20	Wolffish	us	00:08:20			n	n	0	0	0	0	0	n		n		n		n
Oct. 8/9 2016	36	N 50mm	0B	U	DL	00:02:25	Wolffish	ds	00:03:13			n	n	0	0	0	0	0	n		n		n		n
Oct. 8/9 2016	36	N 50mm	0B	U	U	00:06:50	Greenland halibut	us	00:02:00		y	n	n	0	0	0	0	0	n		n		n		n
Oct. 8/9 2016	36	N 50mm	0B	U	U	00:07:40	Wolffish	us	00:01:03			n	n	0	0	0	0	0	n		n		n		n
Oct. 8/9 2016	36	N 50mm	0B	U	UR	00:09:01	Wolffish	us	00:02:10			n	n	0	0	0	0	0	n		n		n		n
Oct. 8/9 2016	36	N 50mm	0B	U	DL	00:11:40	Wolffish	ds	00:01:32			n	n	0	0	0	0	0	n		n		n		n
Oct. 8/9 2016	36	N 50mm	0B	U	DR	00:13:40	Wolffish	ds	00:00:40			n	n	0	0	0	0	0	n		n		n		n
Oct. 8/9 2016	36	N 50mm	0B	U	UL	00:14:30	Rockling sp.	us	00:00:08			n	n	0	0	0	0	0	n		n		n		n
Oct. 8/9 2016	36	N 50mm	0B	U	D	00:14:41	Wolffish	ds	00:01:10			n	n	0	0	0	0	0	n		n		n		n
Oct. 8/9 2016	36	N 50mm	0B	U	UR	00:16:24	Wolffish	us	00:01:15			n	n	0	0	0	0	0	n		n		n		n
Oct. 8/9 2016	36	N 50mm	0B	U	R	00:18:12	Wolffish	cc	00:01:37			n	n	0	0	0	0	0	n		n		n		n
Oct. 8/9 2016	36	N 50mm	0B	U	L	00:20:35	Wolffish	cc	00:03:55			n	n	0	0	0	0	0	n		n		n		n
Oct. 8/9 2016	36	N 50mm	0B	U	UR	00:25:46	Wolffish	us	00:02:15			n	n	0	0	0	0	0	n		n		n		n
Oct. 8/9 2016	36	N 50mm	0B	U	R	00:28:30	Wolffish	cc	00:00:05			n	n	0	0	0	0	0	n		n		n		n
Oct. 8/9 2016	36	N 50mm	0B	U	D	00:29:46	Wolffish	ds	00:00:45			n	n	0	0	0	0	0	n		n		n		n
Oct. 8/9 2016	37	N 50mm	0B	U	UL	00:01:23	Wolffish	us	00:02:04			n	n	0	0	0	0	0	n		n		n		n
Oct. 8/9 2016	37	N 50mm	0B	U	U	00:05:02	Greenland halibut	us	00:00:25		n	n	n	0	0	0	0	0	n		n		n		n
Oct. 8/9 2016	37	N 50mm	0B	U	U	00:05:35	Greenland halibut	us	00:00:06		n	n	n	0	0	0	0	0	n		n		n		n
Oct. 8/9 2016	37	N 50mm	0B	U	U	00:03:10	Roughhead grenadier	us	00:00:12			n	n	0	0	0	0	0	n		n		n		n
Oct. 8/9 2016	37	N 50mm	0B	U	DL	00:04:18	Wolffish	ds	00:00:05			n	n	0	0	0	0	0	n		n		n		n
Oct. 8/9 2016	37	N 50mm	0B	U	DR	00:06:04	Greenland halibut	ds	00:00:04		n	n	n	0	0	0	0	0	n		n		n		n
Oct. 8/9 2016	37	N 50mm	0B	U	L	00:06:54	Wolffish	cc	00:01:06			n	n	0	0	0	0	0	n		n		n		n
Oct. 8/9 2016	37	N 50mm	0B	U	L	00:08:15	Greenland halibut	cc	00:00:10		n	n	n	0	0	0	0	0	n		n		n		n
Oct. 8/9 2016	37	N 50mm	0B	U	DL	00:08:37	Wolffish	ds	00:01:25			n	n	0	0	0	0	0	n		n		n		n
Oct. 8/9 2016	37	N 50mm	0B	U	U	00:11:04	Wolffish	us	00:00:53			n	n	0	0	0	0	0	n		n		n		n
Oct. 8/9 2016	37	N 50mm	0B	U	U	00:13:29	Wolffish	us	00:02:30			n	n	0	0	0	0	0	n		n		n		n
Oct. 8/9 2016	37	N 50mm	0B	U	DL	00:16:13	Greenland halibut	ds	00:00:09		n	n	n	0	0	0	0	0	n		n		n		n
Oct. 8/9 2016	37	N 50mm	0B	U	U	00:16:26	Wolffish	us	00:01:02			n	n	0	0	0	0	0	n		n		n		n
Oct. 8/9 2016	37	N 50mm	0B	U	UR	00:17:47	Wolffish	us	00:09:35			n	n	0	0	0	0	3	n		n		n		n
Oct. 8/9 2016	37	N 50mm	0B	U	R	00:27:35	Wolffish	cc	00:00:30			n	n	0	0	0	0	0	n		n		n		n
Oct. 8/9 2016	37	N 50mm	0B	U	U	00:29:45	Wolffish	us	00:05:18			n	n	0	0	0	0	2	n		n		n		n
Oct. 8/9 2016	38	N 50mm	0B	UL	L	00:05:22	Greenland halibut	us	00:00:43		y	y	n	0	0	0	0	0	n		n		n		n
Oct. 8/9 2016	38	N 50mm	0B	UL	R	00:05:43	Wolffish	ds	00:00:57			n	n	0	0	0	0	0	n		n		n		n
Oct. 8/9 2016	38	N 50mm	0B	UL	R	00:06:49	Wolffish	ds	00:01:00			n	n	0	0	0	0	0	n		n		n		n
Oct. 8/9 2016	38	N 50mm	0B	UL	DL	00:08:29	Wolffish	cc	00:01:46			n	n	0	0	0	0	0	n		n		n		n
Oct. 8/9 2016	38	N 50mm	0B	UL	U	00:09:56	Greenland halibut	us	00:00:16		n	n	n	0	0	0	0	0	n		n		n		n
Oct. 8/9 2016	38	N 50mm	0B	UL	L	00:10:51	Wolffish	us	00:01:14			n	n	0	0	0	0	0	n		n		n		n
Oct. 8/9 2016	38	N 50mm	0B	UL	R	00:13:15	Greenland halibut	ds	00:00:16		y	y	n	0	0	0	0	0	n		n		n		n
Oct. 8/9 2016	38	N 50mm	0B	UL	U	00:14:50	Wolffish	us	00:04:20			n	n	0	0	0	0	0	n		n		n		n
Oct. 8/9 2016	38	N 50mm	0B	UL	R	00:19:40	Wolffish	ds	00:02:27			n	n	0	0	0	0	0	n		n		n		n
Oct. 8/9 2016	38	N 50mm	0B	UL	L	00:22:50	Wolffish	us	00:01:58			n	n	0	0	0	0	0	n		n		n		n
Oct. 8/9 2016	39	N 50mm	0B	UL	U	00:02:52	Wolffish	us	00:01:55			n	n	0	0	0	0	0	n		n		n		n
Oct. 8/9 2016	39	N 50mm	0B	UL	DL	00:05:20	Wolffish	cc	00:01:23			n	n	0	0	0	0	0	n		n		n		n
Oct. 8/9 2016	39	N 50mm	0B	UL	DR	00:07:15	Wolffish	ds	00:00:57			n	n	0	0	0	0	0	n		n		n		n
Oct. 8/9 2016	39	N 50mm	0B	UL	UL	00:07:36	Greenland halibut	us	00:00:43		y	y	n	0	0	0	0	0	n		n		n		n
Oct. 8/9 2016	39	N 50mm	0B	UL	DR	00:09:19	Wolffish	ds	00:00:21			n	n	0	0	0	0	0	n		n		n		n
Oct. 8/9 2016	39	N 50mm	0B	UL	L	00:10:40	Wolffish	us	00:05:20			n	n	0	0	0	0	0	n		n		n		n
Oct. 8/9 2016	39	N 50mm	0B	UL	UR	00:16:59	Wolffish	cc	00:04:21			n	n	0	0	0	0	2	n		n		n		n
Oct. 8/9 2016	39	N 50mm	0B	UL	D	00:21:56	Wolffish	ds	00:03:41			n	n	0	0	0	0	0	n		n		n		n
Oct. 8/9 2016	39	N 50mm	0B	UL	UL	00:25:50	Wolffish	us	00:05:22			n	n	0	0	0	0	0	n		n		n		n
Oct. 8/9 2016	40	N 50mm	0B	UL	U	00:01:22	Greenland halibut	us	00:00:03		y	n	n	0	0	0	0	0	n		n		n		n
Oct. 8/9 2016	40	N 50mm	0B	UL	L	00:03:50	Wolffish	us	00:02:50			n	n	0	0	0	0	0	n		n		n		n
Oct. 8/9 2016	40	N 50mm	0B	UL	U	00:07:13	Wolffish	us	00:05:51			n	n	0	0	0	0	0	n		n		n		n
Oct. 8/9 2016	40	N 50mm	0B	UL	U	00:13:34	Wolffish	us	00:00:54			n	n	0	0	0	0	1	n		n		n		n
Oct. 8/9 2016	40	N 50mm	0B	UL	R	00:15:20	Wolffish	ds	00:01:30			n	n	0	0	0	0	0	n		n		n		n
Oct. 8/9 2016	40	N 50mm	0B	UL	UR	00:17:22	Wolffish	cc	00:00:54			n	n	0	0	0	0	0	n		n		n		n
Oct. 8/9 2016	40	N 50mm	0B	UL	R	00:19:18	Wolffish	ds	00:00:32			n	n	0	0	0	0	0	n		n		n		n
Oct. 8/9 2016	40	N 50mm	0B	UL	D	00:19:46	Greenland halibut	ds	00:00:11		n	n	n	0	0	0	0	0	n		n		n		n
Oct. 8/9 2016	40	N 50mm	0B	UL	D	00:19:54	Wolffish	ds	00:00:19			n	n	0	0	0	0	0	n		n		n		n
Oct. 8/9 2016	40	N 50mm	0B	UL	D	00:20:57	Wolffish	ds	00:04:15			n	n	0	0	0	0	0	n		n		n		n
Oct. 8/9 2016	40	N 50mm	0B	UL	UR	00:25:30	Wolffish	cc	00:03:48			n	n	0	0	0	0	0	n		n		n		n
Oct. 8/9 2016	41	N 50mm	0B	L	R	00:00:15	Wolffish	ds	00:04:30			n	n	0	0	0	0	0	n		n		n		n
Oct. 8/9 2016	41	N 50mm	0B	L	R	00:00:40	Greenland halibut	ds	00:00:03		n	n	n	0	0	0	0	0	n		n		n		n
Oct. 8/9 2016	41	N 50mm	0B	L	UR	00:05:40	Wolffish	ds	00:08:10			n	n	0	0	0	0	2	n		n		n		n
Oct. 8/9 2016	41	N 50mm	0B	L	UR	00:15:00	Wolffish	ds	00:10:16			n	n	0	0	0	0	0	n		n		n		n
Oct. 8/9 2016	41	N 50mm	0B	L	L	00:26:00	Wolffish	us	00:03:13			n	n	0	0	0	0	0	n		n		n		n
Oct. 8/9 2016	42	N 50mm	0B	L	UL	00:00:10	Wolffish	us	00:01:02			n	n	0	0	0	0	0	n		n		n		n
Oct. 8/9 2016	42	N 50mm	0B	L	DL	00:01:30	Wolffish	us	00:04:54			n	n	0	0	0	0	0	n		n		n		n
Oct. 8/9 2016	42	N 50mm	0B	L	L	00:06:00	Greenland halibut	us	00:00:11		n	n	n	0	0	0	0	0	n		n		n		n
Oct. 8/9 2016	42	N 50mm	0B	L	UL	00:06:24	Greenland halibut	us		L	y	y	n	0	0	4	1	0	y	00:01:48	n		n		n		neutral
Oct. 8/9 2016	42	N 50mm	0B	L	UL	00:06:49	Rockling sp.	us	00:00:03			n	n	0	0	0	0	0	n		n		n		n
Oct. 8/9 2016	42	N 50mm	0B	L	L	00:06:55	Wolffish	us	00:07:33			n	n	0	0	0	0	0	n		n		n		n
Oct. 8/9 2016	42	N 50mm	0B	L	U	00:14:54	Wolffish	cc	00:01:52			n	n	0	0	0	0	0	n		n		n		n
Oct. 8/9 2016	42	N 50mm	0B	L	D	00:17:19	Wolffish	cc	00:01:33			n	n	0	0	0	0	0	n		n		n		n
Oct. 8/9 2016	42	N 50mm	0B	L	U	00:19:58	Wolffish	cc	00:06:34			n	n	0	0	0	0	0	n		n		n		n
Oct. 8/9 2016	42	N 50mm	0B	L	L	00:26:16	Wolffish	us	00:00:04			n	n	0	0	0	0	0	n		n		n		n
Oct. 8/9 2016	42	N 50mm	0B	L	L	00:27:00	Greenland halibut	us		L	y	y	n	0	0	0	3	0	y	00:00:05	y	00:42:36	n		n		aggressive	neutral
Oct. 8/9 2016	42	N 50mm	0B	L	UL	00:27:35	Wolffish	us	00:04:50			n	n	0	0	0	0	0	n		n		n		n
Oct. 8/9 2016	43	N 50mm	0B	L	U	00:03:18	Wolffish	cc	00:09:33			n	n	0	0	0	0	0	n		n		n		n
Oct. 8/9 2016	43	N 50mm	0B	L	D	00:09:04	Rockling sp.	cc	00:00:06			n	n	0	0	0	0	0	n		n		n		n
Oct. 8/9 2016	43	N 50mm	0B	L	UR	00:13:00	Wolffish	ds	00:01:22			n	n	0	0	0	0	0	n		n		n		n
Oct. 8/9 2016	43	N 50mm	0B	L	UL	00:15:21	Wolffish	us	00:00:29			n	n	0	0	0	0	0	n		n		n		n
Oct. 8/9 2016	43	N 50mm	0B	L	D	00:17:00	Wolffish	cc	00:00:30			n	n	0	0	0	0	0	n		n		n		n
Oct. 8/9 2016	43	N 50mm	0B	L	DR	00:18:17	Wolffish	ds	00:00:51			n	n	0	0	0	0	0	n		n		n		n
Oct. 8/9 2016	43	N 50mm	0B	L	L	00:20:16	Wolffish	us	00:00:24			n	n	0	0	0	0	0	n		n		n		n
Oct. 8/9 2016	43	N 50mm	0B	L	L	00:21:45	Wolffish	us	00:02:45			n	n	0	0	0	0	0	n		n		n		n
Oct. 8/9 2016	43	N 50mm	0B	L	UL	00:21:45	Wolffish	us	00:08:25			n	n	0	0	0	0	0	n		n		n		n
Oct. 8/9 2016	43	N 50mm	0B	L	U	00:24:44	Wolffish	cc	00:05:29			n	n	0	0	0	0	1	n		n		n		n
Oct. 8/9 2016	44	N 50mm	0B	L	U	00:00:12	Wolffish	cc	00:03:58			n	n	0	0	0	0	0	n		n		n		n
Oct. 8/9 2016	44	N 50mm	0B	L	U	00:00:25	Wolffish	cc	00:00:29			n	n	0	0	0	0	0	n		n		n		n
Oct. 8/9 2016	44	N 50mm	0B	L	R	00:01:26	Wolffish	ds	00:00:44			n	n	0	0	0	0	0	n		n		n		n
Oct. 8/9 2016	44	N 50mm	0B	L	DL	00:02:21	Wolffish	us	00:01:12			n	n	0	0	0	0	0	n		n		n		n
Oct. 8/9 2016	44	N 50mm	0B	L	L	00:04:00	Wolffish	us	00:07:30			n	n	0	0	0	0	0	n		n		n		n
Oct. 8/9 2016	44	N 50mm	0B	L	UL	00:04:27	Wolffish	us	00:00:05			n	n	0	0	0	0	0	n		n		n		n
Oct. 8/9 2016	44	N 50mm	0B	L	UR	00:05:49	Wolffish	ds	00:07:10			n	n	0	0	0	0	1	n		n		n		n
Oct. 8/9 2016	44	N 50mm	0B	L	DR	00:13:20	Wolffish	ds	00:00:45			n	n	0	0	0	0	0	n		n		n		n
Oct. 8/9 2016	44	N 50mm	0B	L	L	00:12:30	Wolffish	us		L		y	n	0	0	1	2	0	y	00:01:24	y	00:37:35	n		n		aggressive	neutral
Oct. 8/9 2016	44	N 50mm	0B	L	D	00:14:30	Wolffish	cc	00:18:51			n	n	0	0	0	0	0	n		n		n		n
Oct. 8/9 2016	44	N 50mm	0B	L	D	00:22:00	Rockling sp.	cc	00:00:03			n	n	0	0	0	0	0	n		n		n		n
Oct. 8/9 2016	45	N 50mm	0B	L	UR	00:03:24	Wolffish	ds	00:02:36			n	n	0	0	0	0	0	n		n		n		n
Oct. 8/9 2016	45	N 50mm	0B	L	U	00:06:31	Wolffish	cc	00:00:19			n	n	0	0	0	0	0	n		n		n		n
Oct. 8/9 2016	45	N 50mm	0B	L	L	00:08:50	Wolffish	us	00:05:27			n	n	0	0	0	0	0	n		n		n		n
Oct. 8/9 2016	45	N 50mm	0B	L	L	00:14:50	Wolffish	us	00:05:10			n	n	0	0	0	0	0	n		n		n		n
Oct. 8/9 2016	45	N 50mm	0B	L	DL	00:24:00	Wolffish	us	00:00:50			n	n	0	0	0	0	1	n		n		n		n
Oct. 8/9 2016	45	N 50mm	0B	L	L	00:26:30	Wolffish	us	00:02:15			n	n	0	0	0	0	0	n		n		n		n
Oct. 8/9 2016	46	N 50mm	0B	L	UR	00:00:24	Wolffish	ds	00:03:36			n	n	0	0	0	0	0	n		n		n		n
Oct. 8/9 2016	46	N 50mm	0B	L	L	00:05:00	Wolffish	us	00:09:48			n	n	0	0	0	0	1	n		n		n		n
Oct. 8/9 2016	46	N 50mm	0B	L	U	00:15:26	Wolffish	cc	00:01:20			n	n	0	0	0	0	0	n		n		n		n
Oct. 8/9 2016	46	N 50mm	0B	L	DL	00:18:17	Wolffish	us	00:18:20			n	n	0	0	0	0	3	n		n		n		n
Oct. 8/9 2016	46	N 50mm	0B	L	DL	00:27:08	Greenland halibut	us	00:00:07		n	n	n	0	0	0	0	0	n		n		n		n
Oct. 8/9 2016	47	N 50mm	0B	L	DR	00:00:55	Rockling sp.	ds	00:00:04			n	n	0	0	0	0	0	n		n		n		n
Oct. 10/11, 2016	51	N 50mm	0B	DR	D	00:28:32	Greenland halibut	us	00:00:06		n	n	n	0	0	0	0	0	n		n		n		n
Oct. 10/11, 2016	51	N 50mm	0B	DR	DR	00:28:42	Greenland halibut	us	00:00:13		y	n	n	0	0	0	0	0	n		n		n		n
Oct. 10/11, 2016	51	N 50mm	0B	DR	DR	00:29:16	Greenland halibut	us	00:00:09		n	n	n	0	0	0	0	0	n		n		n		n
Oct. 10/11, 2016	51	N 50mm	0B	DR	DR	00:29:49	Greenland halibut	us	00:00:02		y	y	n	0	0	0	0	0	n		n		n		n
Oct. 10/11, 2016	52	N 50mm	0B	DR	R	00:00:06	Greenland halibut	us	00:00:12		n	n	n	0	0	0	0	0	n		n		n		n
Oct. 10/11, 2016	52	N 50mm	0B	DR	D	00:02:00	Greenland halibut	us	00:00:15		n	n	n	0	0	0	0	0	n		n		n		n
Oct. 10/11, 2016	52	N 50mm	0B	DR	DR	00:04:41	Greenland halibut	us	00:00:02		n	n	n	0	0	0	0	0	n		n		n		n
Oct. 10/11, 2016	52	N 50mm	0B	DR	L	00:05:02	Greenland halibut	ds	00:00:57		n	n	n	0	0	0	0	0	n		n		n		n
Oct. 10/11, 2016	52	N 50mm	0B	DR	R	00:06:02	Greenland halibut	us	00:00:08		n	n	n	0	0	0	0	0	n		n		n		n
Oct. 10/11, 2016	52	N 50mm	0B	DR	R	00:06:53	Greenland halibut	us	00:50:11		y	y	n	1	0	0	0	0	n		n		n		n
Oct. 10/11, 2016	52	N 50mm	0B	DR	D	00:10:10	Greenland halibut	us	00:00:17		n	n	n	0	0	0	0	0	n		n		n		n
Oct. 10/11, 2016	52	N 50mm	0B	DR	DR	00:10:20	Greenland halibut	us	00:00:11		n	n	n	0	0	0	0	0	n		n		n		n
Oct. 10/11, 2016	52	N 50mm	0B	DR	D	00:13:00	Greenland halibut	us	00:00:21		y	y	y	1	0	0	0	0	n		n		n		n
Oct. 10/11, 2016	52	N 50mm	0B	DR	DR	00:29:05	Greenland halibut	us	00:00:15		n	n	n	0	0	0	0	0	n		n		n		n
Oct. 10/11, 2016	52	N 50mm	0B	DR	UR	00:29:46	Greenland halibut	ds	00:00:03		n	n	n	0	0	0	0	0	n		n		n		n
Oct. 10/11, 2016	53	N 50mm	0B	DR	D	00:00:16	Greenland halibut	us	00:00:08		n	n	n	0	0	0	0	0	n		n		n		n
Oct. 10/11, 2016	53	N 50mm	0B	DR	D	00:00:39	Rockling sp.	us	00:00:22			n	n	0	0	0	0	0	n		n		n		n
Oct. 10/11, 2016	53	N 50mm	0B	DR	UL	00:01:08	Greenland halibut	ds	00:00:24		n	n	n	0	0	0	0	0	n		n		n		n
Oct. 10/11, 2016	53	N 50mm	0B	DR	DR	00:01:32	Rockling sp.	us	00:00:31			n	n	0	0	0	0	0	n		n		n		n
Oct. 10/11, 2016	53	N 50mm	0B	DR	R	00:07:07	Greenland halibut	us	00:00:23		n	n	n	0	0	0	0	0	n		n		n		n
Oct. 10/11, 2016	54	N 50mm	0B	DR	D	00:04:17	Roughhead grenadier	us	00:00:16			n	n	0	0	0	0	0	n		n		n		n
Oct. 10/11, 2016	54	N 50mm	0B	DR	R	00:05:54	Wolffish	us	00:01:38			n	n	0	0	0	0	0	n		n		n		n
Oct. 10/11, 2016	54	N 50mm	0B	DR	U	00:09:12	Wolffish	ds	00:02:52			n	n	0	0	0	0	0	n		n		n		n
Oct. 10/11, 2016	54	N 50mm	0B	DR	D	00:22:00	Wolffish	us	00:03:12			n	n	0	0	0	0	0	n		n		n		n
Oct. 10/11, 2016	54	N 50mm	0B	DR	DR	00:28:28	Wolffish	us		R		y	n	5	2	4	1	0	y	00:00:45	y	00:45:16	n		y	00:11:48	aggressive	aggressive
Oct. 10/11, 2016	55	N 50mm	0B	DR	R	00:13:30	Greenland halibut	us	00:00:26		y	y	n	0	0	0	0	0	n		n		n		n
Oct. 10/11, 2016	55	N 50mm	0B	DR	DR	00:15:39	Wolffish	us	00:14:08			n	n	0	0	0	0	5	n		n		n		n
Oct. 10/11, 2016	56	N 50mm	0B	DR	UR	00:20:38	Greenland halibut	cc		R	y	y	n	1	7	0	1	0	y	00:00:25	y	00:37:00	n		n		aggressive	neutral
Oct. 10/11, 2016	56	N 50mm	0B	DR	D	00:23:15	Rockling sp.	us	00:00:07			n	n	0	0	0	0	0	n		n		n		n
Oct. 10/11, 2016	57	N 50mm	0B	DR	R	00:05:00	Greenland halibut	us	00:00:16		y	y	n	0	0	0	0	0	n		n		n		n
Oct. 10/11, 2016	57	N 50mm	0B	DR	R	00:05:05	Wolffish	us	00:00:11			n	n	0	0	0	0	0	n		n		n		n
Oct. 10/11, 2016	57	N 50mm	0B	DR	R	00:06:00	Wolffish	us	00:00:06			n	n	0	0	0	0	0	n		n		n		n
Oct. 10/11, 2016	57	N 50mm	0B	DR	D	00:19:52	Wolffish	us	00:00:13			n	n	0	0	0	0	0	n		n		n		n
Oct. 10/11, 2016	57	N 50mm	0B	DR	DR	00:20:40	Wolffish	us	00:00:27			n	n	0	0	0	0	0	n		n		n		n
Oct. 10/11, 2016	58	N 50mm	0B	DR	R	00:02:31	Greenland halibut	us	00:00:49		n	n	n	0	0	0	0	0	n		n		n		n
Oct. 10/11, 2016	58	N 50mm	0B	DR	UR	00:11:18	Greenland halibut	cc		R	y	y	n	4	0	5	3	0	y	00:00:18	y	03:58:49	n		n		aggressive	neutral
Oct. 10/11, 2016	59	N 50mm	0B	DR	D	00:15:49	Wolffish	us	00:00:01			n	n	0	0	0	0	0	n		n		n		n
Oct. 10/11, 2016	59	N 50mm	0B	DR	DR	00:14:30	Wolffish	us	00:00:30			n	n	0	0	0	0	0	n		n		n		n
Oct. 10/11, 2016	60	N 50mm	0B	DR	D	00:00:45	Greenland halibut	us	00:00:11		n	n	n	0	0	0	0	0	n		n		n		n
Oct. 10/11, 2016	60	N 50mm	0B	DR	DR	00:13:00	Greenland halibut	us	00:00:15		n	n	n	0	0	0	0	0	n		n		n		n
Oct. 10/11, 2016	62	N 50mm	0B	DR	D	00:10:30	Greenland halibut	us	00:00:39		y	y	n	0	0	0	0	0	n		n		n		n
Oct. 10/11, 2016	62	N 50mm	0B	DR	DR	00:26:58	Greenland halibut	us	00:00:18		y	n	n	0	0	0	0	1	n		n		n		n
Oct. 10/11, 2016	62	N 50mm	0B	DR	D	00:28:26	Wolffish	us	00:01:18			n	n	0	0	0	0	0	n		n		n		n
Oct. 10/11, 2016	63	N 50mm	0B	D	D	00:01:18	Wolffish	us	00:03:47			n	n	0	0	0	0	0	n		n		n		n
Oct. 10/11, 2016	63	N 50mm	0B	D	D	00:01:40	Roughhead grenadier	us	00:00:05			n	n	0	0	0	0	0	n		n		n		n
Oct. 10/11, 2016	63	N 50mm	0B	D	DR	00:05:32	Wolffish	us	00:00:54			n	n	0	0	0	0	0	n		n		n		n
Oct. 10/11, 2016	63	N 50mm	0B	D	D	00:08:40	Wolffish	us	00:05:48			n	n	0	0	0	0	0	n		n		n		n
Oct. 10/11, 2016	63	N 50mm	0B	D	D	00:08:55	Greenland halibut	us	00:00:10		n	n	n	0	0	0	0	0	n		n		n		n
Oct. 10/11, 2016	63	N 50mm	0B	D	UR	00:09:25	Greenland halibut	ds	00:00:09		y	y	n	0	0	0	0	0	n		n		n		n
Oct. 10/11, 2016	63	N 50mm	0B	D	R	00:12:22	Greenland halibut	cc	00:00:30		y	n	n	0	0	0	0	0	n		n		n		n
Oct. 10/11, 2016	63	N 50mm	0B	D	DR	00:15:08	Greenland halibut	us	00:00:10		n	n	n	0	0	0	0	0	n		n		n		n
Oct. 10/11, 2016	63	N 50mm	0B	D	R	00:15:23	Greenland halibut	cc	00:00:07		n	n	n	0	0	0	0	0	n		n		n		n
Oct. 10/11, 2016	63	N 50mm	0B	D	D	00:16:28	Wolffish	us	00:00:12			n	n	0	0	0	0	0	n		n		n		n
Oct. 10/11, 2016	63	N 50mm	0B	D	R	00:19:02	Greenland halibut	cc	00:00:17		y	y	n	0	0	0	0	0	n		n		n		n
Oct. 10/11, 2016	63	N 50mm	0B	D	UR	00:20:42	Wolffish	ds	00:00:10			n	n	0	0	0	0	0	n		n		n		n
Oct. 10/11, 2016	63	N 50mm	0B	D	DR	00:21:16	Wolffish	us	00:02:45			n	n	0	0	0	0	0	n		n		n		n
Oct. 10/11, 2016	64	N 50mm	0B	D	R	00:06:12	Wolffish	cc	00:00:57			n	n	0	0	0	0	0	n		n		n		n
Oct. 10/11, 2016	64	N 50mm	0B	D	D	00:09:39	Wolffish	us	00:35:39			n	n	0	0	0	0	0	n		n		n		n
Oct. 10/11, 2016	64	N 50mm	0B	D	DR	00:29:04	Greenland halibut	us	00:00:32		n	n	n	0	0	0	0	0	n		n		n		n
Oct. 10/11, 2016	65	N 50mm	0B	D	D	00:01:25	Greenland halibut	us	00:00:15		n	n	n	0	0	0	0	0	n		n		n		n
Oct. 10/11, 2016	65	N 50mm	0B	D	DL	00:15:46	Wolffish	us	00:07:53			n	n	0	0	0	0	0	n		n		n		n
Oct. 10/11, 2016	65	N 50mm	0B	D	DR	00:24:48	Wolffish	us	00:11:50			n	n	0	0	0	0	0	n		n		n		n
Oct. 10/11, 2016	65	N 50mm	0B	D	D	00:25:48	Greenland halibut	us	00:00:10		n	n	n	0	0	0	0	0	n		n		n		n
Oct. 10/11, 2016	65	N 50mm	0B	D	D	00:25:58	Wolffish	us	00:00:14			n	n	0	0	0	0	0	n		n		n		n
Oct. 10/11, 2016	66	N 50mm	0B	D	D	00:11:32	Wolffish	us		R		y	n	0	0	0	0	0	y	00:05:06	y	00:52:25	n		n		aggressive	neutral
Oct. 10/11, 2016	66	N 50mm	0B	D	DR	00:14:09	Wolffish	us	00:01:56			n	n	0	0	0	0	0	n		n		n		n
Oct. 10/11, 2016	67	N 50mm	0B	DR	D	00:22:30	Greenland halibut	us	00:00:09		n	n	n	0	0	0	0	0	n		n		n		n
Oct. 10/11, 2016	68	N 50mm	0B	DR	D	00:08:28	Wolffish	us	00:01:51			n	n	0	0	0	0	0	n		n		n		n
Oct. 10/11, 2016	68	N 50mm	0B	DR	R	00:12:09	Greenland halibut	us	00:00:18		y	y	n	0	0	0	0	0	n		n		n		n
Oct. 10/11, 2016	68	N 50mm	0B	DR	D	00:14:00	Greenland halibut	us	00:00:01		n	n	n	0	0	0	0	0	n		n		n		n
Oct. 10/11, 2016	68	N 50mm	0B	DR	R	00:25:00	Greenland halibut	us	00:00:03		y	y	n	0	0	0	0	0	n		n		n		n
Oct. 10/11, 2016	68	N 50mm	0B	DR	UL	00:29:50	Greenland halibut	ds	00:00:05		n	n	n	0	0	0	0	0	n		n		n		n
Oct. 10/11, 2016	69	N 50mm	0B	DR	D	00:00:34	Greenland halibut	us	00:00:14		n	n	n	0	0	0	0	0	n		n		n		n
Oct. 10/11, 2016	69	N 50mm	0B	DR	D	00:00:34	Greenland halibut	us	00:00:07		n	n	n	0	0	0	0	0	n		n		n		n
Oct. 10/11, 2016	69	N 50mm	0B	DR	DR	00:00:48	Wolffish	us	00:00:21			n	n	0	0	0	0	0	n		n		n		n
Oct. 10/11, 2016	69	N 50mm	0B	DR	D	00:01:26	Wolffish	us	00:00:48			n	n	0	0	0	0	0	n		n		n		n
Oct. 10/11, 2016	69	N 50mm	0B	DR	R	00:02:12	Greenland halibut	us	00:00:17		y	y	n	0	0	0	0	0	n		n		n		n
Oct. 10/11, 2016	69	N 50mm	0B	DR	U	00:03:10	Greenland halibut	ds	00:00:05		y	y	y	1	0	0	0	0	n		n		n		n
Oct. 10/11, 2016	69	N 50mm	0B	DR	D	00:05:05	Wolffish	us	00:00:05			n	n	0	0	0	0	0	n		n		n		n
Oct. 10/11, 2016	69	N 50mm	0B	DR	R	00:09:46	Greenland halibut	us	00:00:04		n	n	n	0	0	0	0	0	n		n		n		n
Oct. 10/11, 2016	70	N 50mm	0B	DR	DR	00:07:01	Wolffish	us	00:02:54			n	n	0	0	0	0	0	n		n		n		n
Oct. 10/11, 2016	70	N 50mm	0B	DR	DL	00:11:11	Greenland halibut	cc	00:00:09		n	n	n	0	0	0	0	0	n		n		n		n
Oct. 10/11, 2016	70	N 50mm	0B	DR	UR	00:15:00	Greenland halibut	cc	00:00:28		n	n	n	0	0	0	0	0	n		n		n		n
Oct. 10/11, 2016	70	N 50mm	0B	DR	DR	00:17:20	Wolffish	us	00:00:05			n	n	0	0	0	0	0	n		n		n		n
Oct. 10/11, 2016	70	N 50mm	0B	DR	DL	00:23:50	Greenland halibut	cc	00:00:07		y	y	n	0	0	0	0	0	n		n		n		n
Oct. 10/11, 2016	70	N 50mm	0B	DR	R	00:27:50	Greenland halibut	us	00:01:00		y	y	n	0	0	0	0	0	n		n		n		n
Oct. 10/11, 2016	71	N 50mm	0B	DR	DR	00:06:21	Wolffish	us	00:00:03			n	n	0	0	0	0	0	n		n		n		n
Oct. 10/11, 2016	71	N 50mm	0B	DR	DR	00:14:15	Greenland halibut	us	00:00:55		n	n	n	0	0	0	0	0	n		n		n		n
Oct. 10/11, 2016	71	N 50mm	0B	DR	U	00:22:00	Greenland halibut	ds	00:00:03		n	n	n	0	0	0	0	0	n		n		n		n
Oct. 10/11, 2016	71	N 50mm	0B	DR	D	00:22:30	Greenland halibut	us	00:00:02		n	n	n	0	0	0	0	0	n		n		n		n
Oct. 10/11, 2016	72	N 50mm	0B	DR	DR	00:23:22	Greenland halibut	us	00:00:28		n	n	n	0	0	0	0	0	n		n		n		n
Oct. 10/11, 2016	73	N 50mm	0B	DR	R	00:04:46	Wolffish	us	00:02:44			n	n	0	0	0	0	0	n		n		n		n
Oct. 10/11, 2016	74	N 50mm	0B	DR	DR	00:17:39	Wolffish	us	00:00:05			n	n	0	0	0	0	0	n		n		n		n
Oct. 10/11, 2016	74	N 50mm	0B	DR	DR	00:21:00	Wolffish	us	00:00:03			n	n	0	0	0	0	0	n		n		n		n
Oct. 10/11, 2016	74	N 50mm	0B	DR	DR	00:26:00	Wolffish	us		R		y	n	0	0	0	0	0	y	00:01:48	y	00:09:16	n		n		aggressive	neutral
Oct. 11/12 2016	79	N 50mm	0B	L	D	00:22:13	Rockling sp.	cc	00:00:08			n	n	0	0	0	0	0	n		n		n		n
Oct. 11/12 2016	79	N 50mm	0B	L	L	00:24:15	Rockling sp.	us	00:00:44			n	n	0	0	0	0	0	n		n		n		n
Oct. 11/12 2016	79	N 50mm	0B	L	L	00:26:39	Greenland halibut	us	00:00:41		y	y	n	0	0	0	0	0	n		n		n		n
Oct. 11/12 2016	79	N 50mm	0B	L	L	00:29:20	Greenland halibut	us	00:00:31		n	n	n	0	0	0	0	0	n		n		n		n
Oct. 11/12 2016	80	N 50mm	0B	L	L	00:00:24	Greenland halibut	us	00:00:11		y	y	n	0	0	0	0	0	n		n		n		n
Oct. 11/12 2016	80	N 50mm	0B	L	L	00:00:26	Greenland halibut	us	00:00:09		n	n	n	0	0	0	0	0	n		n		n		n
Oct. 11/12 2016	80	N 50mm	0B	L	UL	00:01:26	Greenland halibut	us	00:00:27		n	n	n	0	0	0	0	0	n		n		n		n
Oct. 11/12 2016	80	N 50mm	0B	L	U	00:08:18	Greenland halibut	ds	00:00:07		y	n	n	0	0	0	0	0	n		n		n		n
Oct. 11/12 2016	80	N 50mm	0B	L	UL	00:09:37	Greenland halibut	us	00:00:17		n	n	n	0	0	0	0	0	n		n		n		n
Oct. 11/12 2016	80	N 50mm	0B	L	U	00:09:58	Greenland halibut	ds	00:00:04		n	n	n	0	0	0	0	0	n		n		n		n
Oct. 11/12 2016	80	N 50mm	0B	L	L	00:12:05	Greenland halibut	us	00:00:19		n	n	n	0	0	0	0	0	n		n		n		n
Oct. 11/12 2016	80	N 50mm	0B	L	DL	00:16:16	Rockling sp.	us	00:01:28			n	n	0	0	0	0	0	n		n		n		n
Oct. 11/12 2016	80	N 50mm	0B	L	L	00:16:35	Greenland halibut	us	00:00:15		y	n	n	0	0	0	0	0	n		n		n		n
Oct. 11/12 2016	80	N 50mm	0B	L	U	00:17:04	Greenland halibut	ds	00:00:32		n	n	n	0	0	0	0	0	n		n		n		n
Oct. 11/12 2016	80	N 50mm	0B	L	L	00:19:20	Greenland halibut	us	00:00:13		n	n	n	0	0	0	0	0	n		n		n		n
Oct. 11/12 2016	80	N 50mm	0B	L	L	00:20:30	Greenland halibut	us	00:00:07		y	n	n	0	0	0	0	0	n		n		n		n
Oct. 11/12 2016	80	N 50mm	0B	L	L	00:22:25	Greenland halibut	us	00:00:02		n	n	n	0	0	0	0	0	n		n		n		n
Oct. 11/12 2016	80	N 50mm	0B	L	UL	00:22:36	Greenland halibut	us	00:00:14		y	y	n	0	0	0	0	0	n		n		n		n
Oct. 11/12 2016	80	N 50mm	0B	L	L	00:23:49	Greenland halibut	us	00:00:10		n	n	n	0	0	0	0	0	n		n		n		n
Oct. 11/12 2016	80	N 50mm	0B	L	DL	00:24:13	Greenland halibut	us	00:00:17		n	n	n	0	0	0	0	0	n		n		n		n
Oct. 11/12 2016	80	N 50mm	0B	L	L	00:25:26	Greenland halibut	us	00:00:06		n	n	n	0	0	0	0	0	n		n		n		n
Oct. 11/12 2016	80	N 50mm	0B	L	UL	00:27:27	Greenland halibut	us	00:00:16		n	n	n	0	0	0	0	0	n		n		n		n
Oct. 11/12 2016	81	N 50mm	0B	L	L	00:00:50	Greenland halibut	us	00:00:28		n	n	n	0	0	0	0	0	n		n		n		n
Oct. 11/12 2016	81	N 50mm	0B	L	L	00:04:10	Greenland halibut	us	00:00:16		n	n	n	0	0	0	0	0	n		n		n		n
Oct. 11/12 2016	81	N 50mm	0B	L	DL	00:04:38	Greenland halibut	us	00:00:27		y	y	n	0	0	0	0	0	n		n		n		n
Oct. 11/12 2016	81	N 50mm	0B	L	U	00:06:16	Greenland halibut	ds	00:00:25		n	n	n	0	0	0	0	0	n		n		n		n
Oct. 11/12 2016	81	N 50mm	0B	L	L	00:07:24	Greenland halibut	us		L	y	y	n	4	0	0	0	0	y	00:00:10	n		y	02:01:20	n		aggressive
Oct. 11/12 2016	81	N 50mm	0B	L	L	00:07:33	Greenland halibut	us	00:00:16		n	n	n	0	0	0	0	0	n		n		n		n
Oct. 11/12 2016	81	N 50mm	0B	L	L	00:09:15	Greenland halibut	us	00:00:17		n	n	n	0	0	0	0	0	n		n		n		n
Oct. 11/12 2016	81	N 50mm	0B	L	DL	00:15:28	Greenland halibut	us	00:00:39		y	n	n	0	0	0	0	0	n		n		n		n
Oct. 11/12 2016	81	N 50mm	0B	L	DL	00:20:49	Greenland halibut	us	00:00:07		n	n	n	0	0	0	0	0	n		n		n		n
Oct. 11/12 2016	81	N 50mm	0B	L	L	00:27:51	Roughhead grenadier	us	00:00:09			n	n	0	0	0	0	0	n		n		n		n
Oct. 11/12 2016	82	N 50mm	0B	L	L	00:12:09	Rockling sp.	us	00:00:31			n	n	0	0	0	0	0	n		n		n		n
Oct. 11/12 2016	83	N 50mm	0B	L	L	00:06:15	Greenland halibut	us	00:00:15		y	n	n	0	0	0	0	0	n		n		n		n
Oct. 11/12 2016	83	N 50mm	0B	L	U	00:05:45	Greenland halibut	ds	00:01:45		n	n	n	0	0	0	0	0	n		n		n		n
Oct. 11/12 2016	83	N 50mm	0B	L	UL	00:10:03	Rockling sp.	us	00:00:16			n	n	0	0	0	0	0	n		n		n		n
Oct. 11/12 2016	83	N 50mm	0B	L	L	00:17:36	Greenland halibut	us	00:00:24		y	y	n	0	0	0	0	0	n		n		n		n
Oct. 11/12 2016	83	N 50mm	0B	L	L	00:29:35	Rockling sp.	us	00:00:12			n	n	0	0	0	0	0	n		n		n		n
Oct. 11/12 2016	85	N 50mm	0B	L	UL	00:02:28	Greenland halibut	us	00:00:28		n	n	n	0	0	0	0	0	n		n		n		n
Oct. 11/12 2016	85	N 50mm	0B	L	DL	00:02:48	Roughhead grenadier	us	00:00:10			n	n	0	0	0	0	0	n		n		n		n
Oct. 11/12 2016	85	N 50mm	0B	L	L	00:03:02	Greenland halibut	us	00:01:07		y	y	n	0	0	0	0	0	n		n		n		n
Oct. 11/12 2016	85	N 50mm	0B	L	DL	00:03:44	Roughhead grenadier	us	00:00:12			n	n	0	0	0	0	0	n		n		n		n
Oct. 11/12 2016	85	N 50mm	0B	L	L	00:04:45	Roughhead grenadier	us	00:00:04			n	n	0	0	0	0	0	n		n		n		n
Oct. 11/12 2016	85	N 50mm	0B	L	DL	00:05:23	Greenland halibut	us	00:02:07		y	y	n	0	0	0	0	0	n		n		n		n
Oct. 11/12 2016	85	N 50mm	0B	L	UL	00:07:45	Greenland halibut	us	00:00:48		n	n	n	0	0	0	0	0	n		n		n		n
Oct. 11/12 2016	85	N 50mm	0B	L	DL	00:08:31	Rockling sp.	us	00:00:04			n	y	1	0	0	0	0	n		n		n		n
Oct. 11/12 2016	85	N 50mm	0B	L	L	00:10:02	Greenland halibut	us	00:00:11		n	n	n	0	0	0	0	0	n		n		n		n
Oct. 11/12 2016	85	N 50mm	0B	L	UL	00:10:47	Greenland halibut	us	00:00:44		y	y	n	0	0	0	0	0	n		n		n		n
Oct. 11/12 2016	85	N 50mm	0B	L	L	00:17:08	Greenland halibut	us	00:00:06		n	n	n	0	0	0	0	0	n		n		n		n
Oct. 11/12 2016	85	N 50mm	0B	L	UL	00:18:08	Greenland halibut	us	00:01:18		n	n	n	0	0	0	0	0	n		n		n		n
Oct. 11/12 2016	85	N 50mm	0B	L	L	00:21:08	Wolffish	us	00:01:16			n	n	0	0	0	0	0	n		n		n		n
Oct. 11/12 2016	85	N 50mm	0B	L	UL	00:23:00	Wolffish	us	00:00:27			n	n	0	0	0	0	0	n		n		n		n
Oct. 11/12 2016	85	N 50mm	0B	L	L	00:23:47	Wolffish	us	00:00:53			n	n	0	0	0	0	0	n		n		n		n
Oct. 11/12 2016	85	N 50mm	0B	L	UL	00:25:05	Wolffish	us	00:00:10			n	n	0	0	0	0	0	n		n		n		n
Oct. 11/12 2016	85	N 50mm	0B	L	L	00:25:41	Wolffish	us	00:02:19			n	n	0	0	0	0	0	n		n		n		n
Oct. 11/12 2016	85	N 50mm	0B	L	UR	00:29:24	Wolffish	ds	00:00:06			n	n	0	0	0	0	0	n		n		n		n
Oct. 11/12 2016	86	N 50mm	0B	L	L	00:00:54	Wolffish	us	00:00:06			n	n	0	0	0	0	0	n		n		n		n
Oct. 11/12 2016	86	N 50mm	0B	L	L	00:01:30	Wolffish	us	00:00:24			n	n	0	0	0	0	0	n		n		n		n
Oct. 11/12 2016	86	N 50mm	0B	L	L	00:02:56	Wolffish	us	00:03:04			n	n	0	0	0	0	0	n		n		n		n
Oct. 11/12 2016	86	N 50mm	0B	L	UR	00:12:04	Roughhead grenadier	ds	00:00:04			n	n	0	0	0	0	0	n		n		n		n
Oct. 11/12 2016	87	N 50mm	0B	L	UL	00:07:49	Greenland halibut	us	00:01:08		y	y	y	1	0	0	0	0	n		n		n		n
Oct. 11/12 2016	87	N 50mm	0B	L	DL	00:12:31	Rockling sp.	us	00:00:09			n	n	0	0	0	0	1	n		n		n		n
Oct. 11/12 2016	87	N 50mm	0B	L	DL	00:13:20	Greenland halibut	us	00:00:15		y	y	n	0	0	0	0	0	n		n		n		n
Oct. 11/12 2016	87	N 50mm	0B	L	L	00:18:02	Greenland halibut	us	00:00:29	L	y	y	n	0	0	0	0	0	y	00:00:10	n		y	00:00:05	n		aggressive
Oct. 11/12 2016	87	N 50mm	0B	L	DL	00:22:30	Greenland halibut	us	00:00:10		n	n	n	0	0	0	0	0	n		n		n		n
Oct. 11/12 2016	87	N 50mm	0B	L	UL	00:27:08	Greenland halibut	us		L	y	y	n	0	3	0	1	0	y	00:00:10	y	00:04:19	n		n		aggressive	aggressive
Oct. 11/12 2016	88	N 50mm	0B	L	L	00:05:55	Greenland halibut	us	00:00:07		n	n	n	0	0	0	0	0	n		n		n		n
Oct. 11/12 2016	88	N 50mm	0B	L	U	00:07:29	Greenland halibut	ds	00:00:09		y	n	n	0	0	0	0	0	n		n		n		n
Oct. 11/12 2016	88	N 50mm	0B	L	UR	00:07:50	Greenland halibut	us	00:00:20		y	y	n	0	0	0	0	0	n		n		n		n
Oct. 11/12 2016	88	N 50mm	0B	L	L	00:10:51	Greenland halibut	us	00:00:29		y	y	n	0	0	0	0	0	n		n		n		n
Oct. 11/12 2016	88	N 50mm	0B	L	UL	00:11:43	Greenland halibut	us	00:00:18		n	n	n	0	0	0	0	0	n		n		n		n
Oct. 11/12 2016	88	N 50mm	0B	L	UL	00:12:24	Greenland halibut	us		L	y	y	n	0	0	1	4	0	y	00:00:30	y	00:09:11	n		n		aggressive	neutral
Oct. 11/12 2016	88	N 50mm	0B	L	L	00:14:27	Skate	us	00:01:45			n	n	0	0	0	0	0	n		n		n		n
Oct. 11/12 2016	88	N 50mm	0B	L	L	00:19:52	Skate	us	00:00:13			n	n	0	0	0	0	0	n		n		n		n
Oct. 11/12 2016	88	N 50mm	0B	L	UL	00:23:05	Greenland halibut	us	00:00:17		y	y	n	0	0	0	0	0	n		n		n		n
Oct. 11/12 2016	88	N 50mm	0B	L	L	00:28:01	Greenland halibut	us	00:00:49		y	n	n	0	0	0	0	0	n		n		n		n
Oct. 11/12 2016	88	N 50mm	0B	L	L	00:29:12	Greenland halibut	us	00:00:14		n	n	n	0	0	0	0	0	n		n		n		n
Oct. 11/12 2016	89	N 50mm	0B	L	L	00:00:51	Greenland halibut	us	00:00:24		n	n	n	0	0	0	0	0	n		n		n		n
Oct. 11/12 2016	89	N 50mm	0B	L	UL	00:05:10	Greenland halibut	us	00:00:31		y	y	n	0	0	0	0	0	n		n		n		n
Oct. 11/12 2016	89	N 50mm	0B	L	R	00:09:45	Rockling sp.	ds	00:00:13			n	n	0	0	0	0	0	n		n		n		n
Oct. 11/12 2016	89	N 50mm	0B	L	DL	00:15:12	Rockling sp.	us	00:00:10			n	n	0	0	0	0	0	n		n		n		n
Oct. 11/12 2016	90	N 50mm	0B	L	D	00:04:26	Rockling sp.	ds	00:00:14			n	n	0	0	0	0	0	n		n		n		n
Oct. 11/12 2016	90	N 50mm	0B	L	DL	00:19:22	Greenland halibut	us	00:00:22		y	n	n	0	0	0	0	1	n		n		n		n
Oct. 11/12 2016	90	N 50mm	0B	L	L	00:27:05	Greenland halibut	us	00:00:09		y	y	y	1	0	0	0	0	n		n		n		n
Oct. 11/12 2016	91	N 50mm	0B	L	L	00:00:40	Greenland halibut	us	00:01:00		n	n	n	0	0	0	0	0	n		n		n		n
Oct. 11/12 2016	91	N 50mm	0B	L	DL	00:03:13	Greenland halibut	us	00:00:14		y	n	n	0	0	0	0	0	n		n		n		n
Oct. 11/12 2016	91	N 50mm	0B	L	L	00:06:20	Greenland halibut	us	00:00:58		n	n	n	0	0	0	0	0	n		n		n		n
Oct. 11/12 2016	91	N 50mm	0B	L	L	00:13:50	Greenland halibut	us	00:00:25		n	n	n	0	0	0	0	0	n		n		n		n
Oct. 11/12 2016	91	N 50mm	0B	L	L	00:17:10	Greenland halibut	us	00:00:15		n	n	n	0	0	0	0	0	n		n		n		n
Oct. 11/12 2016	91	N 50mm	0B	L	D	00:19:10	Greenland halibut	ds	00:00:10		n	n	n	0	0	0	0	0	n		n		n		n
Oct. 11/12 2016	91	N 50mm	0B	L	UR	00:25:14	Greenland halibut	ds	00:00:15		y	y	n	0	0	0	0	0	n		n		n		n			bounces off entrance once
Oct. 11/12 2016	91	N 50mm	0B	L	DL	00:27:50	Greenland halibut	us	00:00:12		y	n	n	0	0	0	0	0	n		n		n		n
Oct. 11/12 2016	91	N 50mm	0B	L	UR	00:28:46	Greenland halibut	ds	00:00:18		n	n	n	0	0	0	0	0	n		n		n		n			bounces off entrance 3 times
Oct. 11/12 2016	92	N 50mm	0B	L	L	00:00:52	Roughhead grenadier	us	00:00:40			n	n	0	0	0	0	0	n		n		n		n
Oct. 11/12 2016	92	N 50mm	0B	L	DL	00:13:38	Greenland halibut	us	00:00:16		n	n	n	0	0	0	0	0	n		n		n		n
Oct. 11/12 2016	92	N 50mm	0B	L	DL	00:15:51	Greenland halibut	us	00:00:19		n	n	n	0	0	0	0	0	n		n		n		n
Oct. 11/12 2016	92	N 50mm	0B	L	UL	00:16:16	Greenland halibut	us	00:00:35		y	y	n	0	0	0	0	0	n		n		n		n
Oct. 11/12 2016	92	N 50mm	0B	L	DL	00:27:36	Greenland halibut	us	00:00:39		n	n	n	0	0	0	0	0	n		n		n		n
Oct. 11/12 2016	92	N 50mm	0B	L	D	00:27:47	Greenland halibut	us	00:00:27		n	n	n	0	0	0	0	0	n		n		n		n
Oct. 11/12 2016	93	N 50mm	0B	L	D	00:02:00	Greenland halibut	ds	00:00:15		n	n	n	0	0	0	0	0	n		n		n		n
Oct. 11/12 2016	93	N 50mm	0B	L	U	00:11:50	Greenland halibut	ds	00:00:20		n	n	n	0	0	0	0	0	n		n		n		n
Oct. 11/12 2016	93	N 50mm	0B	L	L	00:13:23	Greenland halibut	us	00:00:22		n	n	n	0	0	0	0	0	n		n		n		n
Oct. 11/12 2016	94	N 50mm	0B	L	L	00:08:27	Greenland halibut	us	00:01:01		y	y	n	0	0	0	0	0	n		n		n		n
Oct. 11/12 2016	94	N 50mm	0B	L	UL	00:17:55	Greenland halibut	us	00:02:01		n	n	n	0	0	0	0	0	n		n		n		n
Oct. 11/12 2016	94	N 50mm	0B	L	L	00:18:43	Greenland halibut	us	00:00:02		n	n	n	0	0	0	0	0	n		n		n		n
Oct. 11/12 2016	94	N 50mm	0B	L	U	00:19:17	Greenland halibut	ds	00:00:23		n	n	n	0	0	0	0	0	n		n		n		n
Oct. 11/12 2016	94	N 50mm	0B	L	UL	00:20:00	Greenland halibut	us	00:00:06		n	n	n	0	0	0	0	0	n		n		n		n
Oct. 11/12 2016	94	N 50mm	0B	L	L	00:22:40	Greenland halibut	us		L	y	y	n	0	0	0	0	0	y	00:00:07	y	00:01:24	n		n		neutral	neutral
Oct. 11/12 2016	95	N 50mm	0B	L	UL	00:21:30	Greenland halibut	us	00:00:14		n	n	n	0	0	0	0	0	n		n		n		n
Oct. 11/12 2016	95	N 50mm	0B	L	UR	00:27:43	Rockling sp.	ds	00:00:06			n	n	0	0	0	0	0	n		n		n		n
Oct. 11/12 2016	96	N 50mm	0B	L	DL	00:00:33	Rockling sp.	us	00:00:25			n	n	0	0	0	0	0	n		n		n		n
Oct. 11/12 2016	96	N 50mm	0B	L	L	00:05:00	Rockling sp.	us	00:00:06			n	n	0	0	0	0	0	n		n		n		n
Oct. 11/12 2016	96	N 50mm	0B	L	DL	00:07:00	Rockling sp.	us	00:02:00			n	n	0	0	0	0	0	n		n		n		n
Oct. 11/12 2016	96	N 50mm	0B	L	DL	00:20:58	Greenland halibut	us	00:00:11		y	y	y	1	0	0	0	0	n		n		n		n
Oct. 11/12 2016	97	N 50mm	0B	L	U	00:13:54	Greenland halibut	us	00:00:07		n	n	n	0	0	0	0	0	n		n		n		n
Oct. 11/12 2016	97	N 50mm	0B	L	L	00:15:10	Greenland halibut	us	00:00:20		n	n	n	0	0	0	0	0	n		n		n		n
Oct. 11/12 2016	97	N 50mm	0B	L	U	00:16:05	Greenland halibut	us	00:00:10		n	n	n	0	0	0	0	0	n		n		n		n
Oct. 11/12 2016	97	N 50mm	0B	L	UL	00:18:25	Greenland halibut	us	00:00:20		n	n	n	0	0	0	0	0	n		n		n		n
Oct. 11/12 2016	97	N 50mm	0B	L	L	00:25:49	Greenland halibut	us	00:00:12		n	n	n	0	0	0	0	0	n		n		n		n
Oct. 11/12 2016	97	N 50mm	0B	L	D	00:26:40	Greenland halibut	ds	00:00:06		n	n	n	0	0	0	0	0	n		n		n		n
Oct. 12/13, 2016	159	N 50mm	0B	UL	L	00:09:00	Wolffish	us	00:02:00			n	n	0	0	0	0	0	n		n		n		n
Oct. 12/13, 2016	159	N 50mm	0B	UL	U	00:15:00	Greenland halibut	us	00:00:04		n	n	n	0	0	0	0	0	n		n		n		n
Oct. 12/13, 2016	159	N 50mm	0B	UL	U	00:21:00	Greenland halibut	us	00:00:10		n	n	n	0	0	0	0	0	n		n		n		n
Oct. 12/13, 2016	161	N 50mm	0B	UL	UR	00:11:20	Greenland halibut	cc	00:00:08		n	n	n	0	0	0	0	0	n		n		n		n
Oct. 12/13, 2016	161	N 50mm	0B	UL	L	00:23:11	Greenland shark	us	01:07:48			n	n	0	0	0	0	0	n		n		n		n
Oct. 12/13, 2016	161	N 50mm	0B	UL	U	00:13:34	Greenland halibut	us	00:00:18		n	n	n	0	0	0	0	0	n		n		n		n
Oct. 12/13, 2016	165	N 50mm	0B	L	L	00:08:15	Greenland halibut	us	00:00:32	L	y	y	n	0	0	0	0	0	y	00:00:21	n		y	00:00:09	n		neutral
Oct. 12/13, 2016	167	N 50mm	0B	L	DL	00:00:40	Greenland halibut	us	00:00:21		n	n	n	0	0	0	0	0	n		n		n		n
Oct. 12/13, 2016	169	N 50mm	0B	L	UL	00:08:08	Roughhead grenadier	us	00:00:06			n	n	0	0	0	0	0	n		n		n		n
Oct. 12/13, 2016	169	N 50mm	0B	L	DL	00:09:54	Roughhead grenadier	us	00:00:44			n	n	0	0	0	0	0	n		n		n		n
Oct. 12/13, 2016	169	N 50mm	0B	L	UL	00:12:51	Greenland halibut	us	00:00:10		n	n	n	0	0	0	0	0	n		n		n		n
Oct. 12/13, 2016	170	N 50mm	0B	L	L	00:05:26	Wolffish	us	00:01:49			n	n	0	0	0	0	0	n		n		n		n
Oct. 12/13, 2016	170	N 50mm	0B	L	UL	00:10:04	Wolffish	us	00:08:54			n	n	0	0	0	0	0	n		n		n		n
Oct. 12/13, 2016	170	N 50mm	0B	L	DL	00:24:05	Wolffish	us	00:01:10			n	n	0	0	0	0	0	n		n		n		n
Oct. 12/13, 2016	170	N 50mm	0B	L	DR	00:27:03	Wolffish	ds	00:00:07			n	n	0	0	0	0	0	n		n		n		n
Oct. 12/13, 2016	173	N 50mm	0B	DL	L	00:00:24	Wolffish	us	00:00:23			n	n	0	0	0	0	0	n		n		n		n
Oct. 12/13, 2016	173	N 50mm	0B	DL	DL	00:13:44	Rockling sp.	us	00:00:12			n	n	0	0	0	0	0	n		n		n		n
Oct. 12/13, 2016	179	N 50mm	0B	DL	R	00:04:30	Rockling sp.	us		R		y	n	0	0	0	0	0	y	00:00:08	n		n		n
Oct. 12/13, 2016	181	N 50mm	0B	DL	D	00:16:17	Greenland halibut	us	00:00:25		n	n	n	0	0	0	0	0	n		n		n		n
Oct. 12/13, 2016	183	N 50mm	0B	DL	U	00:04:42	Rockling sp.	ds	00:00:06			n	n	0	0	0	0	0	n		n		n		n
Oct. 12/13, 2016	183	N 50mm	0B	DL	DL	00:08:11	Wolffish	us	00:06:01			n	n	0	0	0	0	0	n		n		n		n
Oct. 12/13, 2016	183	N 50mm	0B	DL	L	00:15:54	Greenland halibut	us	00:02:08		n	n	n	0	0	0	0	0	n		n		n		n
Oct. 12/13, 2016	183	N 50mm	0B	DL	D	00:17:45	Greenland halibut	us	00:00:45		n	n	n	0	0	0	0	0	n		n		n		n
Oct. 12/13, 2016	183	N 50mm	0B	DL	DL	00:19:50	Greenland halibut	us	00:00:32		y	y	n	0	0	0	0	0	n		n		n		n
Oct. 12/13, 2016	183	N 50mm	0B	DL	DL	00:20:58	Greenland halibut	us	00:00:29		n	n	n	0	0	0	0	0	n		n		n		n
Oct. 12/13, 2016	183	N 50mm	0B	DL	D	00:24:13	Greenland halibut	us	00:02:04		y	y	n	0	0	0	0	0	n		n		n		n
Oct. 12/13, 2016	183	N 50mm	0B	DL	L	00:28:04	Roughhead grenadier	us	00:00:12			n	n	0	0	0	0	0	n		n		n		n
Oct. 12/13, 2016	183	N 50mm	0B	DL	L	00:29:22	Greenland halibut	us	00:00:07		n	n	n	0	0	0	0	0	n		n		n		n
Oct. 12/13, 2016	184	N 50mm	0B	DL	U	00:00:01	Wolffish	ds	00:00:28			n	n	0	0	0	0	0	n		n		n		n
Oct. 12/13, 2016	185	N 50mm	0B	DL	DL	00:00:18	Roughhead grenadier	us	00:00:28			n	n	0	0	0	0	0	n		n		n		n
Oct. 12/13, 2016	185	N 50mm	0B	DL	D	00:01:24	Roughhead grenadier	us	00:00:20			n	n	0	0	0	0	0	n		n		n		n
Oct. 12/13, 2016	185	N 50mm	0B	DL	D	00:02:38	Wolffish	us	00:04:08			n	n	0	0	0	0	0	n		n		n		n
Oct. 12/13, 2016	185	N 50mm	0B	DL	D	00:09:20	Wolffish	us	00:02:40			n	n	0	0	0	0	0	n		n		n		n
Oct. 12/13, 2016	187	N 50mm	0B	DL	L	00:17:00	Wolffish	us	00:03:50			n	n	0	0	0	0	0	n		n		n		n
Oct. 12/13, 2016	187	N 50mm	0B	DL	D	00:21:00	Greenland halibut	us	00:01:15		n	n	n	0	0	0	0	0	n		n		n		n
Oct. 12/13, 2016	187	N 50mm	0B	DL	DL	00:25:17	Greenland halibut	us	00:00:54		n	n	n	0	0	0	0	0	n		n		n		n
Oct. 12/13, 2016	187	N 50mm	0B	DL	D	00:26:07	Wolffish	us	00:02:54			n	n	0	0	0	0	0	n		n		n		n
Oct. 12/13, 2016	187	N 50mm	0B	DL	DL	00:29:42	Wolffish	us	00:07:38			n	n	0	0	0	0	0	n		n		n		n
Oct. 12/13, 2016	189	N 50mm	0B	DL	U	00:10:02	Rockling sp.	ds	00:00:02			n	n	0	0	0	0	0	n		n		n		n
Oct. 13/14 2016	205	N 50mm	0B	DR	DR	00:18:33	Greenland halibut	us	00:00:14		n	n	n	0	0	0	0	0	n		n		n		n
Oct. 13/14 2016	205	N 50mm	0B	DR	R	00:28:12	Greenland halibut	us		R	y	y	n	10	0	1	2	0	y	00:00:24	n		n		n		aggressive
Oct. 13/14 2016	207	N 50mm	0B	DR	DR	00:15:59	Greenland halibut	us	00:00:14		n	n	n	0	0	0	0	0	n		n		n		n
Oct. 13/14 2016	207	N 50mm	0B	DR	DR	00:17:51	Greenland halibut	us	00:00:24		n	n	n	0	0	0	0	0	n		n		n		n
Oct. 13/14 2016	207	N 50mm	0B	DR	U	00:18:22	Greenland halibut	ds	00:00:10		n	n	n	0	0	0	0	0	n		n		n		n
Oct. 13/14 2016	207	N 50mm	0B	DR	DR	00:19:20	Greenland halibut	us	00:00:25		y	n	n	0	0	0	0	1	n		n		n		n
Oct. 13/14 2016	207	N 50mm	0B	DR	DR	00:21:29	Greenland halibut	us	00:35:18	R	y	y	n	0	0	0	1	0	y	00:00:37	n		y	00:34:21	n		aggressive
Oct. 13/14 2016	207	N 50mm	0B	DR	D	00:24:14	Greenland halibut	us	00:00:37		n	n	n	0	0	0	0	0	n		n		n		n
Oct. 13/14 2016	207	N 50mm	0B	DR	DL	00:24:44	Rockling sp.	cc	00:00:20			n	n	0	0	0	0	0	n		n		n		n
Oct. 13/14 2016	209	N 50mm	0B	DR	DR	00:00:31	Greenland halibut	us	00:01:06		n	n	n	0	0	0	0	0	n		n		n		n
Oct. 13/14 2016	211	N 50mm	0B	DR	DR	00:02:28	Greenland halibut	us	00:00:06		n	n	n	0	0	0	0	0	n		n		n		n
Oct. 13/14 2016	211	N 50mm	0B	DR	DR	00:11:42	Greenland halibut	us	00:00:40		n	n	n	0	0	0	0	0	n		n		n		n
Oct. 13/14 2016	211	N 50mm	0B	DR	D	00:26:44	Greenland halibut	us	00:00:15		n	n	n	0	0	0	0	0	n		n		n		n
Oct. 13/14 2016	211	N 50mm	0B	DR	D	00:27:58	Greenland halibut	us	00:00:52		n	n	n	0	0	0	0	0	n		n		n		n
Oct. 13/14 2016	219	N 50mm	0B	L	UL	00:14:41	Roughhead grenadier	us	00:00:35			n	n	0	0	0	0	0	n		n		n		n
Oct. 13/14 2016	219	N 50mm	0B	L	D	00:15:53	Roughhead grenadier	cc	00:00:47			n	n	0	0	0	0	0	n		n		n		n
Oct. 26/27 2016	410	N 19mm	0A	DL	DL	00:19:38	Greenland halibut	us	00:02:27		y	y	n	0	0	0	0	0	n		n		n		n
Oct. 26/27 2016	410	N 19mm	0A	DL	D	00:24:00	Greenland halibut	us	00:00:23		n	n	n	0	0	0	0	0	n		n		n		n
Oct. 26/27 2016	411	N 19mm	0A	DL	UL	00:02:19	Greenland halibut	cc	00:00:07		n	n	n	0	0	0	0	0	n		n		n		n
Oct. 26/27 2016	411	N 19mm	0A	DL	DL	00:05:17	Greenland halibut	us	00:00:05		n	n	n	0	0	0	0	0	n		n		n		n
Oct. 26/27 2016	411	N 19mm	0A	DL	DL	00:05:17	Greenland halibut	us	00:00:07		n	n	n	0	0	0	0	0	n		n		n		n
Oct. 26/27 2016	411	N 19mm	0A	DL	DL	00:11:51	Greenland halibut	us	00:00:33		y	y	n	0	0	0	0	0	n		n		n		n
Oct. 26/27 2016	411	N 19mm	0A	DL	DL	00:14:41	Greenland halibut	us	00:02:21		y	y	n	0	0	0	0	0	n		n		n		n
Oct. 26/27 2016	411	N 19mm	0A	DL	DL	00:14:58	Greenland halibut	us	00:00:05		n	n	n	0	0	0	0	0	n		n		n		n
Oct. 26/27 2016	411	N 19mm	0A	DL	D	00:15:42	Greenland halibut	us	00:00:14		n	n	n	0	0	0	0	0	n		n		n		n
Oct. 26/27 2016	411	N 19mm	0A	DL	L	00:17:02	Greenland halibut	us	00:07:24	L	y	y	n	0	0	0	0	0	y	00:01:06	n		y	00:07:17	n		aggressive
Oct. 26/27 2016	411	N 19mm	0A	DL	L	00:18:06	Greenland halibut	us	00:00:56		y	y	n	0	0	0	0	0	n		n		n		n
Oct. 26/27 2016	412	N 19mm	0A	DL	L	00:01:44	Greenland halibut	us	00:00:16		n	n	n	0	0	0	0	0	n		n		n		n
Oct. 26/27 2016	412	N 19mm	0A	DL	L	00:03:06	Greenland halibut	us	00:00:35		n	n	n	0	0	0	0	0	n		n		n		n
Oct. 26/27 2016	412	N 19mm	0A	DL	L	00:05:58	Greenland halibut	us	00:00:02		y	y	n	0	0	0	0	0	n		n		n		n
Oct. 26/27 2016	412	N 19mm	0A	DL	L	00:06:20	Greenland halibut	us	00:00:30		n	n	n	0	0	0	0	0	n		n		n		n
Oct. 26/27 2016	412	N 19mm	0A	DL	L	00:07:48	Greenland halibut	us		L	y	y	n	1	7	0	0	0	y	00:00:41	y	00:02:04	n		n		aggressive	neutral
Oct. 26/27 2016	412	N 19mm	0A	DL	DR	00:09:50	Greenland halibut	cc	00:00:12		n	n	n	0	0	0	0	0	n		n		n		n
Oct. 26/27 2016	414	N 19mm	0A	L	DL	00:09:00	Greenland halibut	us	00:00:11		n	n	n	0	0	0	0	0	n		n		n		n
Oct. 26/27 2016	414	N 19mm	0A	L	L	00:11:00	Greenland halibut	us	00:01:50		n	n	n	0	0	0	0	0	n		n		n		n
Oct. 26/27 2016	414	N 19mm	0A	L	L	00:18:16	Skate	us		L		y	n	0	0	0	1	0	y	00:01:20	y	00:31:24	n		n		aggressive
Oct. 26/27 2016	414	N 19mm	0A	L	L	00:18:26	Greenland halibut	us	00:00:48		n	n	n	0	0	0	0	0	n		n		n		n
Oct. 26/27 2016	414	N 19mm	0A	L	L	00:28:23	Greenland halibut	us	00:03:28		y	y	n	0	0	0	0	0	n		n		n		n
Oct. 26/27 2016	415	N 19mm	0A	L	L	00:01:07	Greenland halibut	us	00:00:54		n	n	n	0	0	0	0	0	n		n		n		n
Oct. 26/27 2016	415	N 19mm	0A	L	UL	00:05:45	Greenland halibut	us	00:00:05		n	n	n	0	0	0	0	0	n		n		n		n
Oct. 26/27 2016	415	N 19mm	0A	L	DL	00:10:25	Greenland halibut	us	00:00:01		n	n	n	0	0	0	0	0	n		n		n		n
Oct. 26/27 2016	415	N 19mm	0A	L	DL	00:10:26	Greenland halibut	us	00:00:18		n	n	n	0	0	0	0	0	n		n		n		n
Oct. 26/27 2016	415	N 19mm	0A	L	UL	00:12:20	Greenland halibut	us		L	y	y	n	2	2	0	0	0	y	00:02:00	y	01:21:11	n		n		neutral	neutral
Oct. 26/27 2016	416	N 19mm	0A	UL	L	00:26:19	Greenland halibut	us	00:01:15		n	n	n	0	0	0	0	0	n		n		n		n
Oct. 26/27 2016	417	N 19mm	0A	UL	UL	00:26:22	Greenland halibut	us	12:28:33	L	y	y	n	0	0	0	0	0	y	00:00:06	y	03:26:14	y	12:28:23	y	10:19:18	neutral	neutral
Oct. 26/27 2016	418	N 19mm	0A	UL	L	00:18:45	Greenland halibut	us	00:01:15		n	n	n	0	0	0	0	0	n		n		n		n
Oct. 26/27 2016	418	N 19mm	0A	UL	D	00:23:00	Greenland halibut	ds	00:00:15		n	n	n	0	0	0	0	0	n		n		n		n
Oct. 26/27 2016	426	N 19mm	0A	DR	DR	00:02:37	Greenland halibut	us	00:00:05		n	n	n	0	0	0	0	0	n		n		n		n
Oct. 26/27 2016	434	N 19mm	0A	DR	DR	00:00:23	Greenland halibut	us		R	y	y	n	1	0	5	4	0	y	00:00:17	y	00:23:55	n		n		neutral	neutral
Oct. 26/27 2016	434	N 19mm	0A	DR	DR	00:03:39	Greenland halibut	us		R	y	y	n	0	0	0	1	0	y	00:00:09	n		n		n		neutral
Oct. 26/27 2016	451	N 19mm	0A	UL	UL	00:13:12	Greenland halibut	us		L	y	y	n	0	0	0	4	0	y	00:00:05	y	00:00:42	n		n		aggressive	neutral
Oct. 26/27 2016	454	N 19mm	0A	U	U	00:03:33	Greenland halibut	us	00:00:21		y	n	n	0	0	0	0	1	n		n		n		n
Oct. 26/27 2016	454	N 19mm	0A	U	L	00:05:48	Greenland halibut	cc	00:53:59	L	y	y	n	0	0	0	0	0	y	00:00:17	n		y	00:53:40	n		aggressive
Oct. 26/27 2016	458	N 19mm	0A	R	U	00:12:25	Greenland halibut	cc	00:00:13		n	n	n	0	0	0	0	0	n		n		n		n
Oct. 26/27 2016	459	N 19mm	0A	DR	R	00:10:40	Greenland halibut	us		R	y	y	n	0	0	0	0	0	y	00:00:03	y	00:16:26	n		n		neutral	neutral
Oct. 27 2016	223	N 19mm	0A	D	D	00:21:40	Greenland halibut	us	00:08:12		n	n	n	0	0	0	0	0	n		n		n		n
Oct. 27 2016	230	N 19mm	0A	DL	L	00:10:07	Skate	us	00:00:27			n	n	0	0	0	0	0	n		n		n		n
Oct. 27 2016	234	N 19mm	0A	UR	U	00:28:05	Greenland halibut	us	00:00:33		n	n	n	0	0	0	0	0	n		n		n		n
Oct. 27 2016	239	N 19mm	0A	UR	L	00:01:20	Skate	ds	00:00:35			n	n	0	0	0	0	0	n		n		n		n
Oct. 27 2016	240	N 19mm	0A	UR	UR	00:12:08	Skate	us	00:00:58			n	n	0	0	0	0	0	n		n		n		n
Oct. 27/28 2016	469	N 19mm	0A	R	U	00:08:47	Greenland halibut	cc	00:00:33		n	n	n	0	0	0	0	0	n		n		n		n
Oct. 27/28 2016	469	N 19mm	0A	R	DR	00:14:20	Greenland halibut	us	00:00:08		n	n	n	0	0	0	0	0	n		n		n		n
Oct. 27/28 2016	470	N 19mm	0A	R	R	00:04:17	Greenland halibut	us	00:54:07		y	y	y	1	0	0	0	0	n		n		n		n
Oct. 27/28 2016	476	N 19mm	0A	DR	D	00:04:25	Greenland halibut	us	00:00:50		n	n	n	0	0	0	0	0	n		n		n		n
Oct. 27/28 2016	478	N 19mm	0A	DR	DR	00:11:54	Greenland halibut	us	00:00:39		n	n	n	0	0	0	0	0	n		n		n		n
Oct. 27/28 2016	478	N 19mm	0A	DR	DR	00:26:06	Greenland halibut	us		L	y	y	n	0	2	0	0	0	y	00:01:34	y	00:02:08	n		n		neutral	neutral
Oct. 27/28 2016	480	N 19mm	0A	DR	DR	00:03:15	Greenland halibut	us	00:00:23		n	n	n	0	0	0	0	0	n		n		n		n
Oct. 27/28 2016	481	N 19mm	0A	D	DR	00:13:40	Greenland halibut	us	15:10:33		y	y	y	1	0	0	0	0	n		n		n		n
Oct. 27/28 2016	482	N 19mm	0A	DL	L	00:22:26	Skate	us	00:01:00			n	n	0	0	0	0	0	n		n		n		n
Oct. 27/28 2016	484	N 19mm	0A	L	L	00:27:30	Greenland halibut	us		L	y	y	n	1	1	0	1	0	y	00:02:00	y	01:31:10	n		n		neutral	aggressive
Oct. 27/28 2016	486	N 19mm	0A	UL	UL	00:27:00	Greenland halibut	us	00:00:03		n	n	n	0	0	0	0	0	n		n		n		n
Oct. 27/28 2016	487	N 19mm	0A	UL	L	00:00:00	Greenland halibut	us	00:00:58		n	n	n	0	0	0	0	0	n		n		n		n
Oct. 27/28 2016	487	N 19mm	0A	UL	U	00:03:50	Greenland halibut	us	00:00:10		n	n	n	0	0	0	0	0	n		n		n		n
Oct. 27/28 2016	487	N 19mm	0A	UL	L	00:05:40	Greenland halibut	us	00:00:30		y	y	n	0	0	0	0	0	n		n		n		n
Oct. 27/28 2016	490	N 19mm	0A	UL	UL	00:00:19	Greenland halibut	us		L	y	y	n	0	0	0	5	0	y	00:00:15	y	03:34:15	n		n		aggressive	aggressive
Oct. 27/28 2016	492	N 19mm	0A	UL	U	00:26:16	Greenland halibut	us	00:00:03		n	n	n	0	0	0	0	0	n		n		n		n
Oct. 27/28 2016	492	N 19mm	0A	UL	U	00:27:05	Greenland halibut	us	00:00:07		n	n	n	0	0	0	0	0	n		n		n		n
Oct. 27/28 2016	493	N 19mm	0A	UL	UL	00:18:26	Greenland halibut	us	00:00:50		n	n	n	0	0	0	0	0	n		n		n		n
Oct. 27/28 2016	496	N 19mm	0A	U	L	00:04:00	Greenland halibut	cc		L	y	y	n	0	1	0	0	0	y	00:00:10	y	00:00:48	n		n		aggressive	aggressive
Oct. 27/28 2016	496	N 19mm	0A	U	U	00:04:25	Greenland halibut	us	00:00:27		n	n	n	0	0	0	0	0	n		y		n		n
Oct. 27/28 2016	499	N 19mm	0A	UR	U	00:02:45	Greenland halibut	us	00:00:03		n	n	n	0	0	0	0	0	n		n		n		n
Oct. 27/28 2016	499	N 19mm	0A	UR	R	00:07:30	Greenland halibut	us		R	y	y	n	1	0	2	1	0	y	00:00:10	n		n		n		aggressive
Oct. 27/28 2016	504	N 19mm	0A	DR	DL	00:01:13	Greenland halibut	cc	01:01:52		y	n	n	0	0	0	0	0	n		n		n		n
Oct. 27/28 2016	504	N 19mm	0A	DR	UR	00:12:50	Greenland halibut	cc	00:00:25		y	y	n	0	0	0	0	0	n		n		n		n
Oct. 27/28 2016	506	N 19mm	0A	DR	DR	00:17:57	Greenland halibut	us	00:00:13		n	n	n	0	0	0	0	0	n		n		n		n
Oct. 28/29 2016	251	N 19mm	0A	R	R	00:10:58	Skate	us	00:03:48			n	n	0	0	0	0	0	n		n		n		n
Oct. 28/29 2016	253	N 19mm	0A	R	D	00:13:40	Skate	cc	00:00:40			n	n	0	0	0	0	0	n		n		n		n
Oct. 28/29 2016	254	N 19mm	0A	R	R	00:00:11	Greenland halibut	us	00:00:30		n	n	n	0	0	0	0	0	n		n		n		n
Oct. 28/29 2016	254	N 19mm	0A	R	R	00:13:56	Greenland halibut	us	00:00:08		y	y	n	0	0	0	0	0	n		n		n		n
Oct. 28/29 2016	254	N 19mm	0A	R	UR	00:18:59	Greenland halibut	us	00:00:13		y	n	n	0	0	0	0	1	n		n		n		n
Oct. 28/29 2016	254	N 19mm	0A	R	R	00:21:25	Greenland halibut	us	00:01:08		n	n	n	0	0	0	0	0	n		n		n		n
Oct. 20/21 2016	302	N 50mm	0A	UR	UR	00:17:55	Roughhead grenadier	us	00:00:07			n	n	0	0	0	0	0	n		n		n		n
Oct. 20/21 2016	304	N 50mm	0A	R	R	00:06:09	Greenland halibut	us		R	y	y	n	0	8	1	3	0	y	00:00:51	y	00:25:36	n		n		neutral	neutral
Oct. 20/21 2016	304	N 50mm	0A	R	DR	00:10:23	Greenland halibut	us	00:00:16		n	n	n	0	0	0	0	0	n		n		n		n
Oct. 20/21 2016	307	N 50mm	0A	DR	R	00:18:56	Greenland halibut	us	00:00:40	R	y	y	n	0	0	0	0	0	y	00:00:14	n		y	00:00:18	n		neutral
Oct. 20/21 2016	307	N 50mm	0A	DR	R	00:19:10	Greenland halibut	us	00:00:26		y	y	n	0	0	0	0	0	n		n		n		n
Oct. 20/21 2016	307	N 50mm	0A	DR	R	00:20:20	Greenland halibut	us	12:11:58	R	y	y	n	2	0	3	2	0	y	00:03:07	n		y	12:08:47	n		neutral
Oct. 20/21 2016	307	N 50mm	0A	DR	DR	00:22:53	Greenland halibut	us	00:00:19		y	y	n	0	0	0	0	0	n		n		n		n
Oct. 20/21 2016	309	N 50mm	0A	D	DR	00:27:50	Greenland halibut	us	00:00:04		n	n	n	0	0	0	0	0	n		n		n		n
Oct. 20/21 2016	315	N 50mm	0A	D	D	00:29:29	Skate	us	00:00:39			n	n	0	0	0	0	0	n		n		n		n
Oct. 20/21 2016	316	N 50mm	0A	DR	D	00:24:33	Skate	us	00:00:04			n	n	0	0	0	0	0	n		n		n		n
Oct. 20/21 2016	325	N 50mm	0A	UR	UR	00:26:56	Greenland halibut	us	00:00:42		n	n	n	0	0	0	0	0	n		n		n		n
Oct. 20/21 2016	326	N 50mm	0A	UR	UR	00:03:12	Skate	us	00:05:35			n	n	0	0	0	0	0	n		n		n		n
Oct. 20/21 2016	328	N 50mm	0A	UR	UR	00:12:39	Greenland halibut	us	00:01:19		n	n	n	0	0	0	0	0	n		n		n		n
Oct. 20/21 2016	329	N 50mm	0A	UR	U	00:00:25	Skate	us	00:00:15			n	n	0	0	0	0	0	n		n		n		n
Oct. 20/21 2016	332	N 50mm	0A	U	U	00:25:15	Skate	us	00:29:13			n	n	0	0	0	0	0	n		n		n		n
Oct. 20/21 2016	336	N 50mm	0A	L	L	00:16:18	Greenland halibut	us		L	y	y	n	1	0	1	0	0	y	00:01:12	y	02:44:33	n		n		aggressive	aggressive
Oct. 20/21 2016	339	N 50mm	0A	L	D	00:00:43	Greenland halibut	cc	00:00:09		n	n	n	0	0	0	0	0	n		n		n		n
Oct. 20/21 2016	339	N 50mm	0A	L	L	00:19:18	Skate	us	00:00:19			n	n	0	0	0	0	0	n		n		n		n
Oct. 20/21 2016	339	N 50mm	0A	DL	DL	00:27:55	Greenland halibut	us	00:00:36		n	n	n	0	0	0	0	0	n		n		n		n
Oct. 20/21 2016	339	N 50mm	0A	DL	D	00:28:50	Greenland halibut	us	00:00:30		y	y	n	0	0	0	0	0	n		n		n		n
Oct. 20/21 2016	347	N 50mm	0A	R	UL	00:08:35	Greenland halibut	ds	00:00:11		n	n	n	0	0	0	0	0	n		n		n		n
Oct. 20/21 2016	347	N 50mm	0A	R	R	00:09:01	Greenland halibut	us	00:00:20		n	n	n	0	0	0	0	0	n		n		n		n
Oct. 20/21 2016	347	N 50mm	0A	R	R	00:09:50	Greenland halibut	us	00:08:10	R	y	y	n	0	0	0	0	0	y	00:00:23	n		y	00:00:22	n		aggressive
Oct 23/24	353	N 50mm	0A	L	U	00:25:42	Greenland halibut	cc	00:00:22		n	n	n	0	0	0	0	0	n		n		n		n
Oct 23/24	354	N 50mm	0A	L	DL	00:26:30	Greenland halibut	us	00:00:40		y	y	n	0	0	0	0	0	n		n		n		n
Oct 23/24	357	N 50mm	0A	L	U	00:12:18	Greenland halibut	cc	00:00:54		n	n	n	0	0	0	0	0	n		n		n		n
Oct 23/24	365	N 50mm	0A	DR	DR	00:04:43	Greenland halibut	us	00:00:25		y	y	n	0	0	0	0	0	n		n		n		n
Oct 23/24	365	N 50mm	0A	DR	UR	00:10:57	Greenland halibut	cc		R	y	y	n	1	3	1	4	0	y	00:00:33	y	00:05:54	n		n		aggressive	neutral
Oct 23/24	368	N 50mm	0A	DR	DR	00:13:35	Greenland halibut	us	00:00:55		y	y	n	0	0	0	0	0	n		n		n		n
Oct 23/24	368	N 50mm	0A	DR	D	00:18:17	Greenland halibut	us	00:00:19		n	n	n	0	0	0	0	0	n		n		n		n
Oct 23/24	368	N 50mm	0A	DR	UR	00:18:20	Greenland halibut	cc	00:00:22		n	n	n	0	0	0	0	0	n		n		n		n
Oct 23/24	368	N 50mm	0A	DR	D	00:19:05	Greenland halibut	us	00:00:15		n	n	n	0	0	0	0	0	n		n		n		n
Oct 23/24	368	N 50mm	0A	DR	R	00:20:56	Greenland halibut	us		R	y	y	n	4	0	1	3	0	y	00:00:18	n		n		n		neutral
Oct 23/24	369	N 50mm	0A	DR	R	00:12:37	Greenland halibut	us	00:00:33		n	n	n	0	0	0	0	0	n		n		n		n
Oct 23/24	369	N 50mm	0A	DR	UR	00:13:50	Greenland halibut	cc	00:00:15		y	y	n	0	0	0	0	0	n		n		n		n
Oct 23/24	384	N 50mm	0A	L	UL	00:11:21	Greenland halibut	us	00:01:30		y	y	n	0	0	0	0	0	n		n		n		n
Oct 23/24	386	N 50mm	0A	L	L	00:10:45	Greenland halibut	us	00:00:45		n	n	n	0	0	0	0	0	n		n		n		n
Oct 23/24	387	N 50mm	0A	L	U	00:26:35	Greenland halibut	cc	00:00:17		n	n	n	0	0	0	0	0	n		n		n		n
Oct 23/24	390	N 50mm	0A	L	L	00:17:16	Greenland halibut	us		L	y	y	n	0	0	0	5	0	y	00:00:19	n		n		n		neutral
Oct 23/24	398	N 50mm	0A	DR	D	00:21:11	Wolffish	us	02:31:13			n	n	0	0	0	0	0	n		n		n		n
Oct.24/25 2016	165	N 50mm	0A	DL	D	00:11:45	Greenland halibut	us	00:01:30		n	n	n	0	0	0	0	0	n		n		n		n
Oct.24/25 2016	168	N 50mm	0A	DL	DL	00:06:15	Greenland halibut	us	00:00:47		y	y	n	0	0	0	0	0	n		n		n		n
Oct.24/25 2016	168	N 50mm	0A	DL	DL	00:14:50	Skate	us	00:00:44			n	n	0	0	0	0	0	n		n		n		n
Oct.24/25 2016	168	N 50mm	0A	DL	DL	00:18:42	Greenland halibut	us	00:02:23		y	y	n	0	0	0	0	0	n		n		n		n
Oct.24/25 2016	168	N 50mm	0A	DL	D	00:20:26	Greenland halibut	us	00:00:16		y	y	n	0	0	0	0	0	n		n		n		n
Oct.24/25 2016	169	N 50mm	0A	DL	DL	00:06:48	Greenland halibut	us	00:01:00		n	n	n	0	0	0	0	0	n		n		n		n
Oct.24/25 2016	169	N 50mm	0A	DL	L	00:10:04	Greenland halibut	us	00:00:06		n	n	n	0	0	0	0	0	n		n		n		n
Oct.24/25 2016	169	N 50mm	0A	DL	DL	00:10:12	Greenland halibut	us	00:00:08		y	y	y	1	0	0	0	0	n		n		n		n
Oct.24/25 2016	169	N 50mm	0A	DL	DL	00:12:30	Greenland halibut	us	00:00:30		y	y	y	1	0	0	0	0	n		n		n		n
Oct.24/25 2016	169	N 50mm	0A	DL	DL	00:14:07	Greenland halibut	us	00:00:51		y	y	n	0	0	0	0	0	n		n		n		n
Oct.24/25 2016	169	N 50mm	0A	DL	DL	00:16:54	Greenland halibut	us	00:00:16		y	y	n	0	0	0	0	0	n		n		n		n
Oct.24/25 2016	169	N 50mm	0A	DL	DL	00:17:50	Greenland halibut	us	00:01:10		n	n	n	0	0	0	0	0	n		n		n		n
Oct.24/25 2016	169	N 50mm	0A	DL	DL	00:18:28	Greenland halibut	us	00:02:17		n	n	n	0	0	0	0	0	n		n		n		n
Oct.24/25 2016	170	N 50mm	0A	DL	DL	00:00:16	Greenland halibut	us	00:00:21		y	y	n	0	0	0	0	0	n		n		n		n
Oct.24/25 2016	170	N 50mm	0A	DL	DL	00:03:58	Greenland halibut	us	00:00:29		n	n	n	0	0	0	0	0	n		n		n		n
Oct.24/25 2016	170	N 50mm	0A	DL	DL	00:04:22	Greenland halibut	us	00:00:18		n	n	n	0	0	0	0	0	n		n		n		n
Oct.24/25 2016	171	N 50mm	0A	DL	DL	00:15:20	Greenland halibut	us	00:00:23		n	n	n	0	0	0	0	0	n		n		n		n
Oct.24/25 2016	175	N 50mm	0A	DR	D	00:08:19	Greenland halibut	us	00:00:24		n	n	n	0	0	0	0	0	n		n		n		n
Oct.24/25 2016	175	N 50mm	0A	DR	R	00:19:00	Greenland halibut	us	00:00:12		y	y	n	0	0	0	0	0	n		n		n		n
Oct.24/25 2016	175	N 50mm	0A	DR	R	00:19:04	Greenland halibut	us	00:00:12		n	n	n	0	0	0	0	0	n		n		n		n
Oct.24/25 2016	175	N 50mm	0A	DR	DR	00:19:21	Greenland halibut	us	00:00:19		n	n	n	0	0	0	0	0	n		n		n		n
Oct.24/25 2016	175	N 50mm	0A	DR	L	00:19:53	Greenland halibut	ds	12:03:52	L	y	y	n	4	0	2	0	0	y	00:00:07	n		y	12:03:38	n		aggressive
Oct.24/25 2016	175	N 50mm	0A	DR	R	00:27:57	Greenland halibut	us	00:00:13		n	n	n	0	0	0	0	0	n		n		n		n
Oct.24/25 2016	179	N 50mm	0A	R	R	00:05:39	Greenland halibut	us	00:00:05		n	n	n	0	0	0	0	0	n		n		n		n
Oct.24/25 2016	179	N 50mm	0A	R	U	00:06:15	Greenland halibut	cc	00:00:16		n	n	n	0	0	0	0	0	n		n		n		n
Oct.24/25 2016	179	N 50mm	0A	R	R	00:28:45	Greenland halibut	us	00:00:15		y	y	n	0	0	0	0	0	n		n		n		n
Oct.24/25 2016	180	N 50mm	0A	R	R	00:03:57	Greenland halibut	us	00:00:21		n	n	n	0	0	0	0	0	n		n		n		n
Oct.24/25 2016	180	N 50mm	0A	R	DR	00:07:15	Greenland halibut	us	00:05:18	R	y	y	n	0	0	0	1	0	y	00:01:10	n		y	00:05:13	n		aggressive
Oct.24/25 2016	181	N 50mm	0A	R	DR	00:02:45	Greenland halibut	us	00:00:38		n	n	n	0	0	0	0	0	n		n		n		n
Oct.24/25 2016	181	N 50mm	0A	R	DR	00:15:18	Greenland halibut	us	00:00:05		n	n	n	0	0	0	0	0	n		n		n		n
Oct.24/25 2016	181	N 50mm	0A	R	UR	00:18:33	Greenland halibut	us	00:00:20		n	n	n	0	0	0	0	0	n		n		n		n
Oct.24/25 2016	182	N 50mm	0A	R	UR	00:15:07	Greenland halibut	us	00:00:08		n	n	n	0	0	0	0	0	n		n		n		n
Oct.24/25 2016	183	N 50mm	0A	R	R	00:27:48	Greenland halibut	us	00:00:12		y	y	n	0	0	0	0	0	n		n		n		n
Oct.24/25 2016	183	N 50mm	0A	R	UL	00:29:24	Greenland halibut	ds	00:00:22		n	n	n	0	0	0	0	0	n		n		n		n
Oct.24/25 2016	185	N 50mm	0A	R	UR	00:01:01	Greenland halibut	us	00:00:39		n	n	n	0	0	0	0	0	n		n		n		n
Oct.24/25 2016	189	N 50mm	0A	UL	UL	00:14:31	Greenland halibut	us	00:00:27		n	n	n	0	0	0	0	0	n		n		n		n
Oct.24/25 2016	192	N 50mm	0A	UL	L	00:05:38	Greenland halibut	us	00:00:22		n	n	n	0	0	0	0	0	n		n		n		n
Oct.24/25 2016	192	N 50mm	0A	UL	L	00:06:33	Greenland halibut	us	00:07:02	L	y	y	n	1	0	1	1	0	y	00:00:26	n		y	00:06:27	n		aggressive
Oct.24/25 2016	195	N 50mm	0A	UL	L	00:10:39	Roughhead grenadier	us	00:02:07			n	n	0	0	0	0	0	n		n		n		n
Oct.24/25 2016	195	N 50mm	0A	UL	U	00:21:21	Greenland halibut	us	00:00:15		n	n	n	0	0	0	0	0	n		n		n		n
Oct.24/25 2016	195	N 50mm	0A	UL	U	00:22:40	Greenland halibut	us	00:00:12		n	n	n	0	0	0	0	0	n		n		n		n
Oct.24/25 2016	204	N 50mm	0A	L	L	00:01:26	Greenland shark	us	00:09:01			n	n	0	0	0	0	0	n		n		n		n
Oct.24/25 2016	213	N 50mm	0A	D	D	00:15:42	Greenland halibut	us	00:01:03		n	n	n	0	0	0	0	0	n		n		n		n
Oct.24/25 2016	216	N 50mm	0A	D	D	00:10:23	Greenland halibut	us	00:00:27		n	n	n	0	0	0	0	0	n		n		n		n
Oct. 20 2016	135	N 50mm	0A	L	L	00:29:07	Greenland halibut	us	00:00:44		y	y	n	0	0	0	0	0	n		n		n		n
Oct. 20 2016	136	N 50mm	0A	UL	L	00:20:05	Skate	us	00:15:31			y	n	0	0	0	1	0	y	00:00:35	n		y	00:13:46	n
Oct. 20 2016	140	N 50mm	0A	DR	DL	00:19:29	Roughhead grenadier	cc	00:00:07			n	n	0	0	0	0	0	n		n		n		n
Oct. 20 2016	140	N 50mm	0A	DR	DR	00:29:22	Roughhead grenadier	us	00:02:32			n	n	0	0	0	0	0	n		n		n		n
Oct. 20 2016	141	N 50mm	0A	DR	D	00:02:19	Roughhead grenadier	us	00:02:02			n	n	0	0	0	0	0	n		n		n		n
Oct. 20 2016	141	N 50mm	0A	DR	D	00:20:29	Greenland halibut	us	00:00:18		n	n	n	0	0	0	0	0	n		n		n		n
Oct. 20 2016	146	N 50mm	0A	DR	D	00:08:48	Greenland halibut	us	00:00:25		y	n	n	0	0	0	0	0	n		n		n		n
Oct. 20 2016	147	N 50mm	0A	DR	D	00:09:15	Skate	us	00:00:16			n	n	0	0	0	0	0	n		n		n		n
Oct. 20 2016	151	N 50mm	0A	D	D	00:18:50	Greenland halibut	us	00:00:09		n	n	n	0	0	0	0	0	n		n		n		n
Oct. 20 2016	152	N 50mm	0A	D	L	00:17:20	Greenland halibut	cc	00:00:26		y	y	n	0	0	0	0	0	n		n		n		n
Oct. 20 2016	152	N 50mm	0A	D	D	00:28:30	Greenland halibut	us	00:00:34		n	n	n	0	0	0	0	0	n		n		n		n
Oct. 20 2016	154	N 50mm	0A	D	D	00:06:29	Greenland halibut	us	00:00:12		n	n	n	0	0	0	0	0	n		n		n		n
Oct. 20 2016	154	N 50mm	0A	D	D	00:25:56	Greenland shark	us	00:00:20			n	n	0	0	0	0	0	n		n		n		n
